# Supplementary material for: Muraymycin Nucleoside Antibiotics: Structure-Activity Relationship for Variations in the Nucleoside Unit
Source: PubMed Central journal article supplement (PMC6983020; doi:10.3390/molecules25010022), 2019-12-19
Supplement: molecules-25-00022-s001.pdf [file molecules-25-00022-s001.pdf]

## Supplementary Materials

### Muraymycin Nucleoside Antibiotics: Structure-Activity Relationship for Variations in the Nucleoside Unit

Anna Heib<sup>1</sup>, Giuliana Niro<sup>1</sup>, Stefanie C. Weck<sup>1</sup>, Stefan Koppermann<sup>1</sup> and  
Christian Ducho<sup>1,\*</sup>

<sup>1</sup> Saarland University, Department of Pharmacy, Pharmaceutical and Medicinal Chemistry,  
Campus C2 3, 66 123 Saarbrücken, Germany

Corresponding author \*E-mail: christian.ducho@uni-saarland.de

#### Table of contents

|                                                                                               |    |
|-----------------------------------------------------------------------------------------------|----|
| Measured data and inhibition curves from MraY assays.....                                     | S2 |
| <sup>1</sup> H, <sup>13</sup> C and <sup>19</sup> F NMR spectra of synthesized compounds..... | S6 |

## Measured data and inhibition curves from MraY assays

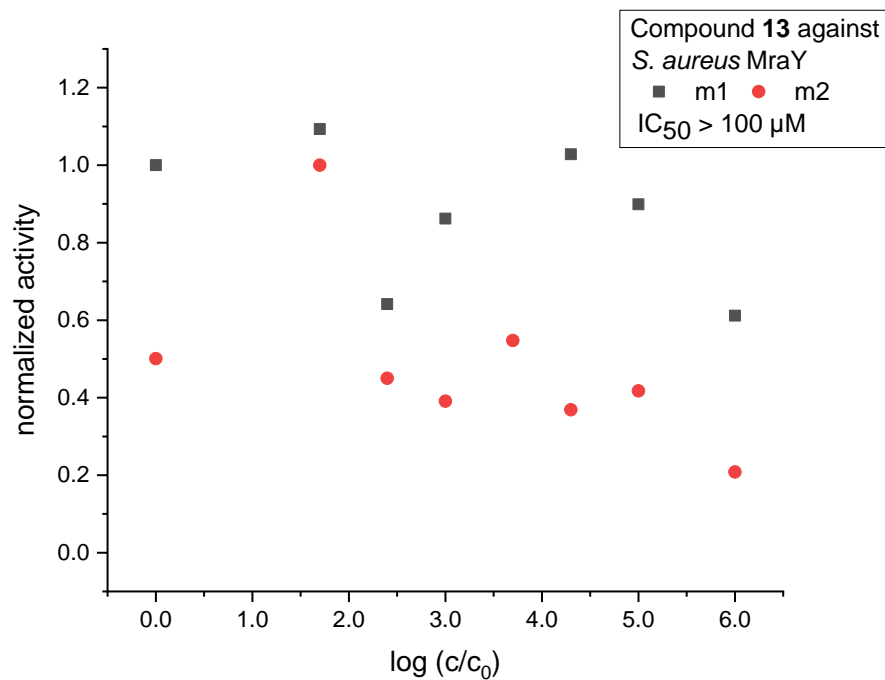

**Figure S1.** MraY assay with MraY from *S. aureus* (crude membranes) and compound **13** as inhibitor (original data, shown as individual series of measurements;  $c_0 = 1$  nM).

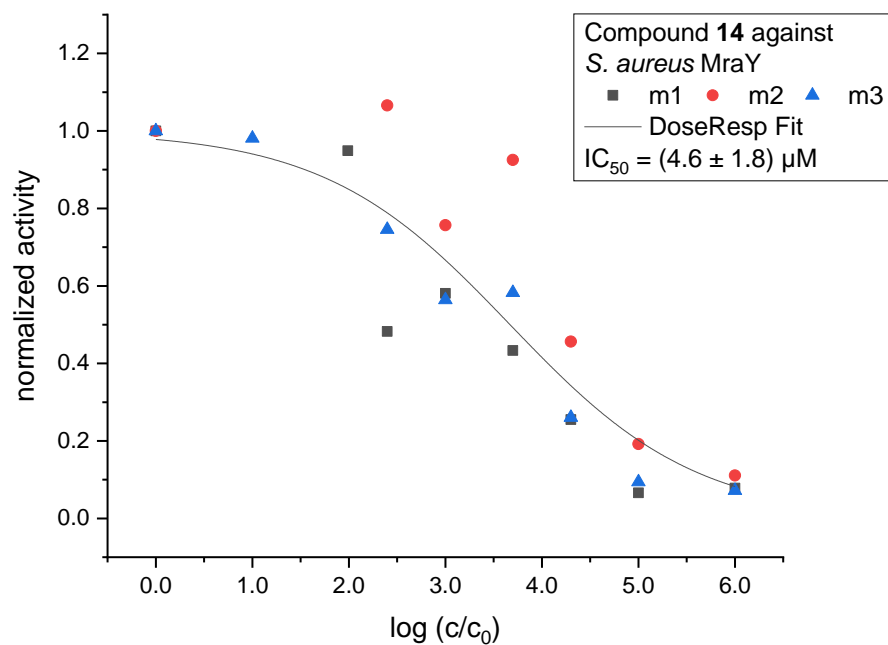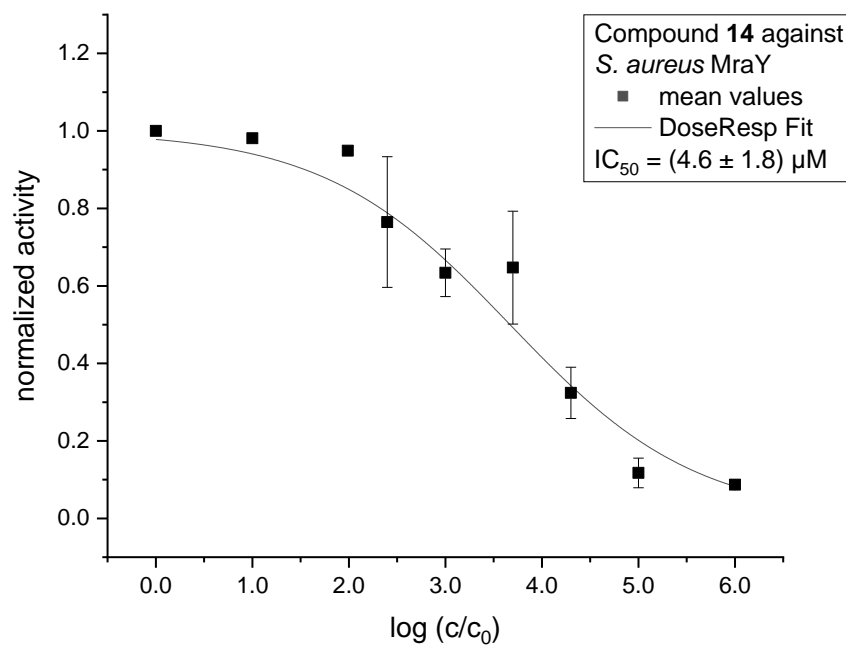

**Figure S2.** Mray assay with Mray from *S. aureus* (crude membranes) and compound **14** as inhibitor, including the fitted curve for Mray activity (top: original data used for fitting the curve, with data points shown as individual series of measurements; bottom: values displayed as mean values and standard deviations, for illustrative purposes;  $c_0 = 1$  nM).

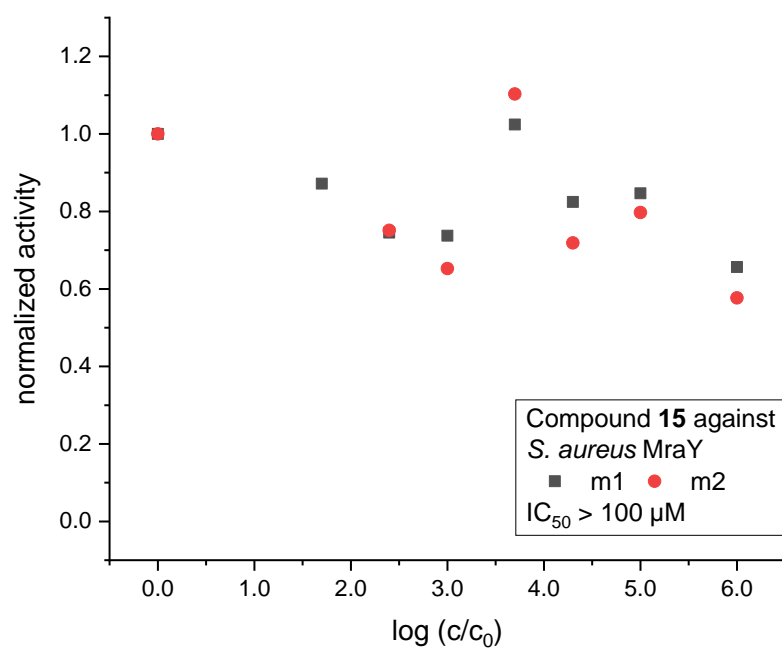

**Figure S3.** MraY assay with MraY from *S. aureus* (crude membranes) and compound **15** as inhibitor (original data, shown as individual series of measurements;  $c_0 = 1$  nM).

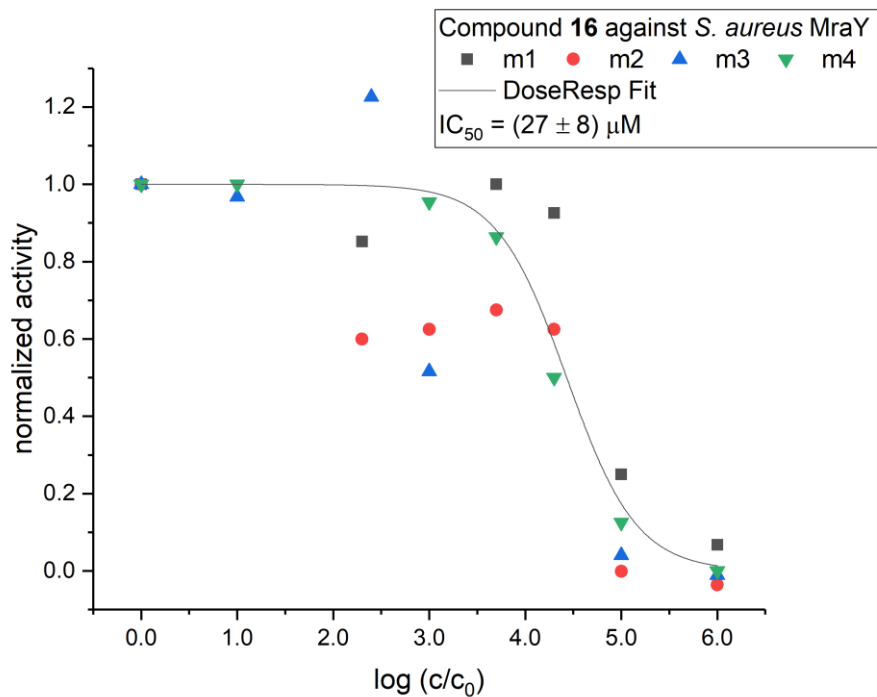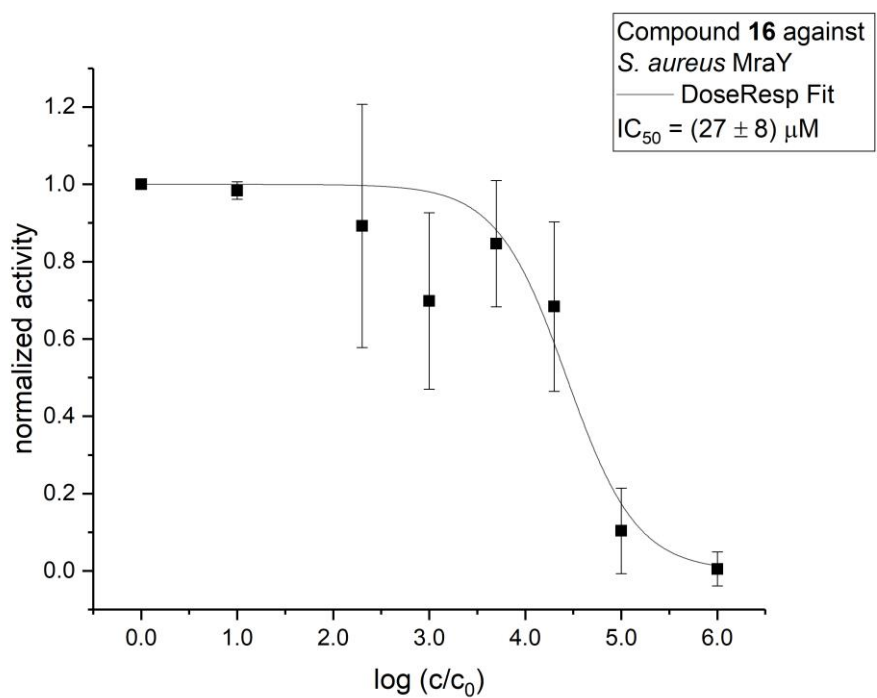

**Figure S4.** MraY assay with MraY from *S. aureus* (crude membranes) and compound **16** as inhibitor, including the fitted curve for MraY activity (top: original data used for fitting the curve, with data points shown as individual series of measurements; bottom: values displayed as mean values and standard deviations, for illustrative purposes;  $c_0 = 1 \text{ nM}$ ).

# $^1\text{H}$ , $^{13}\text{C}$ and $^{19}\text{F}$ NMR spectra of synthesized compounds

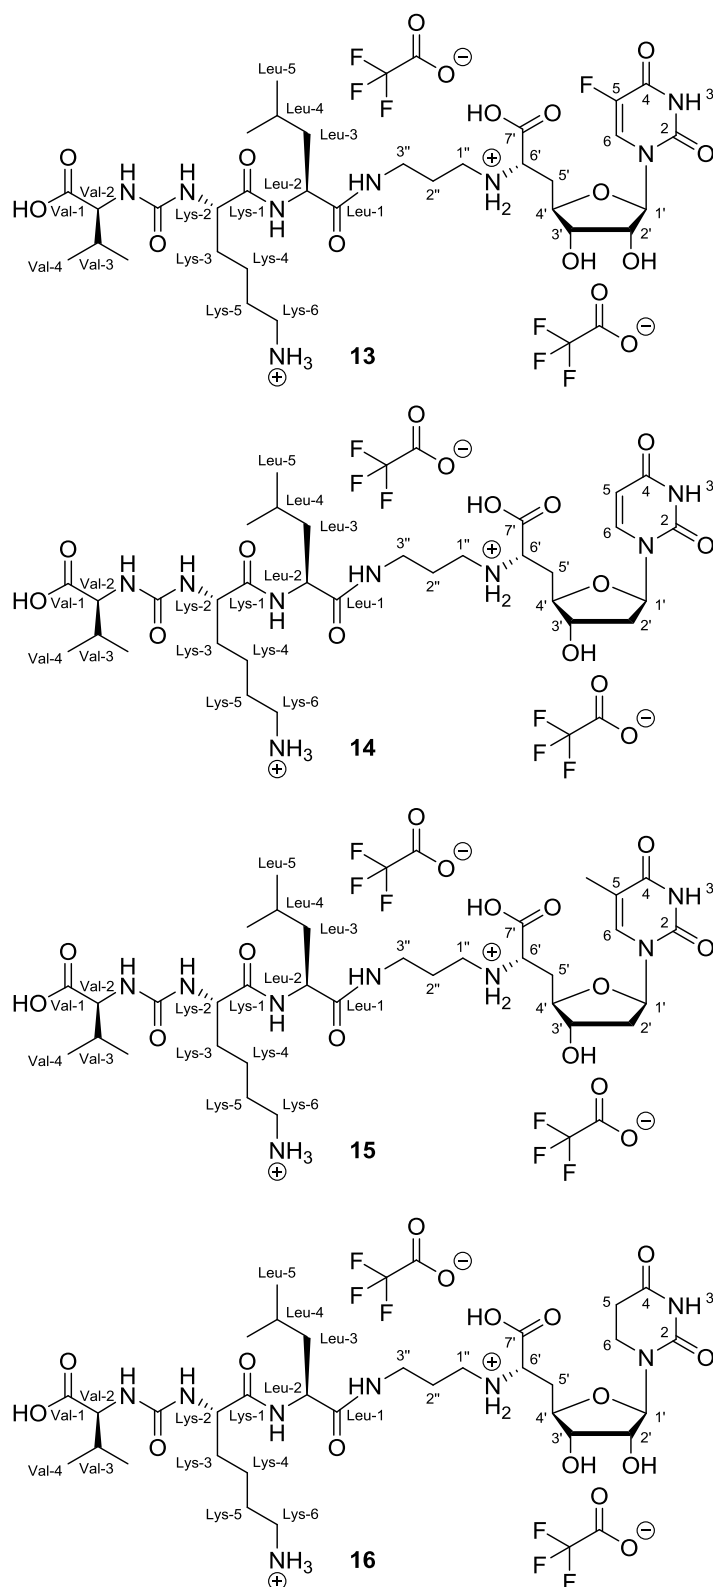

**Figure S5.** Numbering of atoms of muraymycin target structures **13-16** for the assignment of NMR signals.

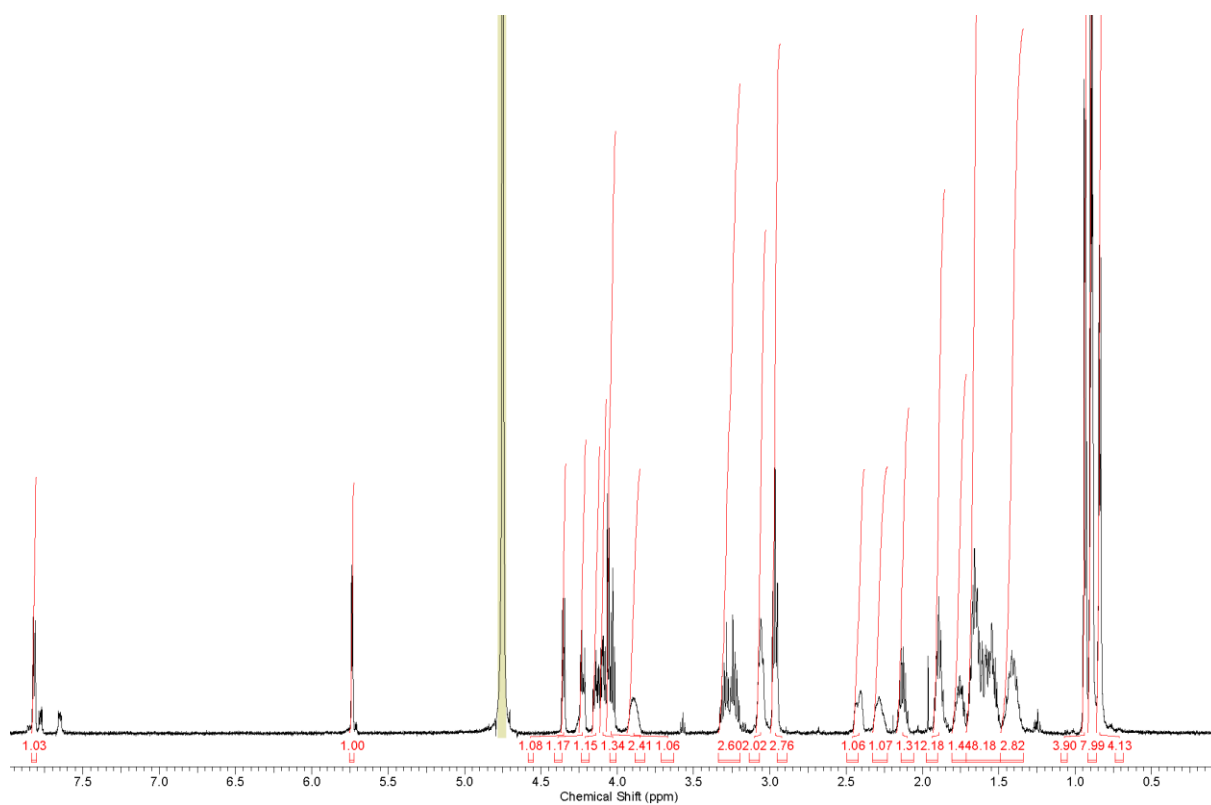

$^1\text{H}$  NMR spectrum of **13** (500 MHz,  $\text{D}_2\text{O}$ ).

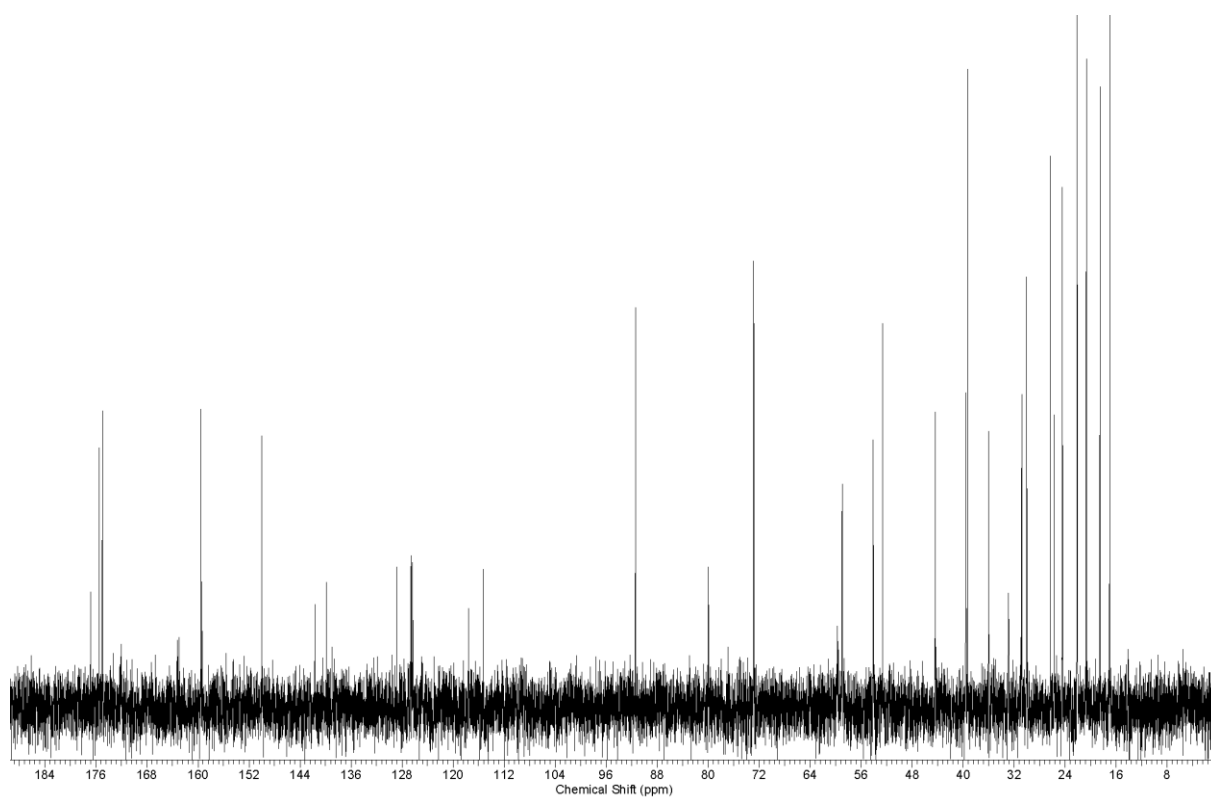

$^{13}\text{C}$  NMR spectrum of **13** (126 MHz,  $\text{D}_2\text{O}$ ).

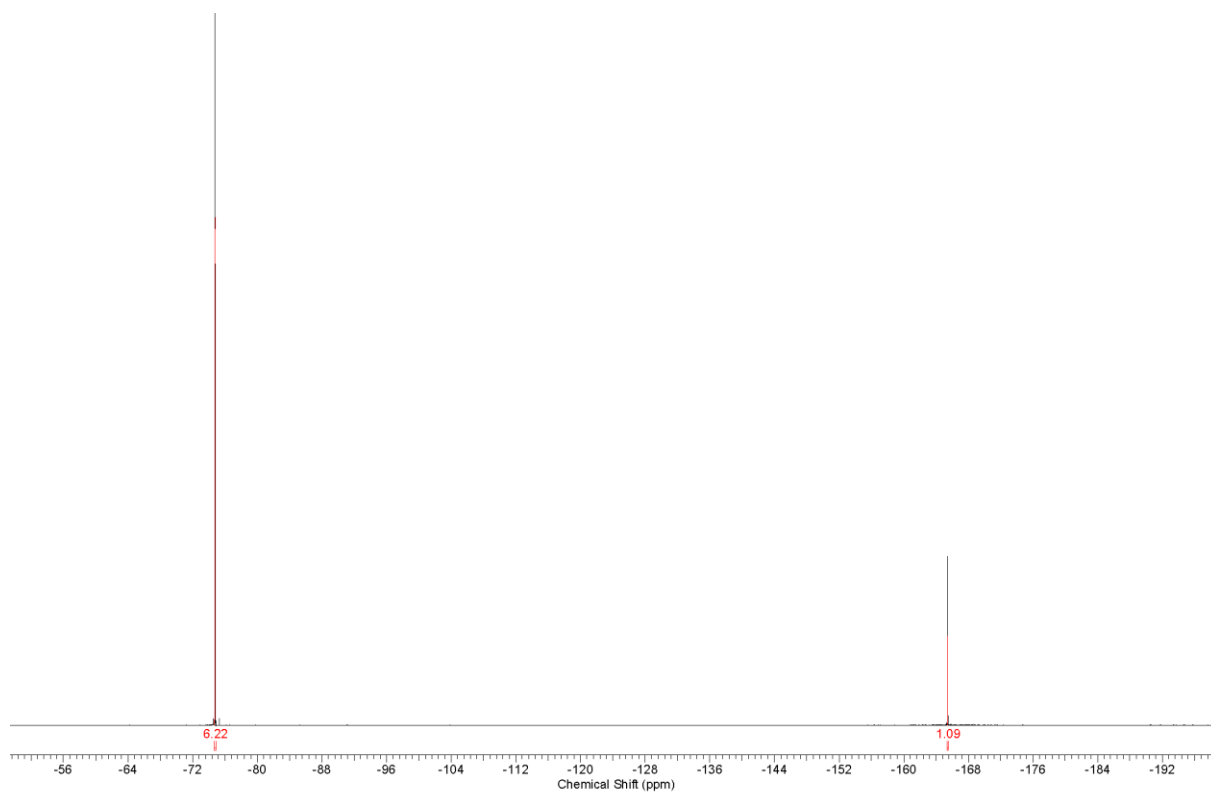

$^{19}\text{F}$  NMR spectrum of **13** (376 MHz,  $\text{D}_2\text{O}$ ).



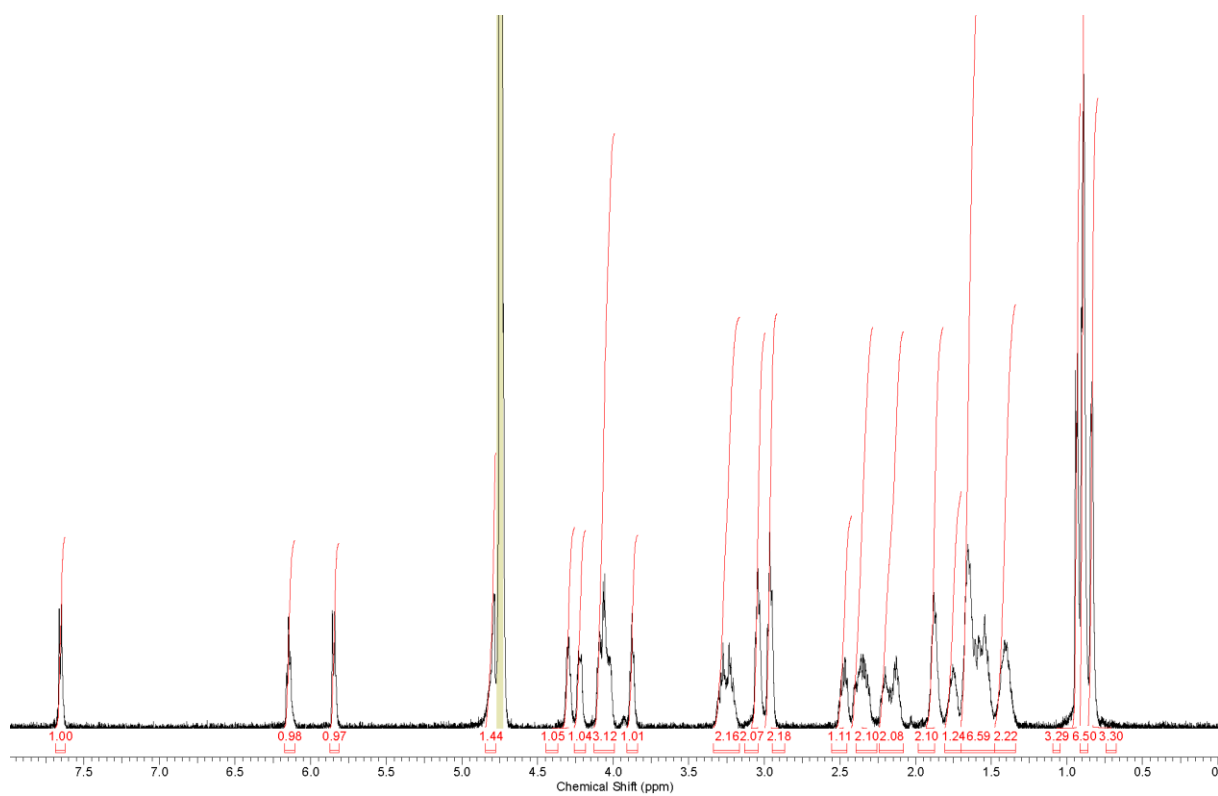

$^1\text{H}$  NMR spectrum of **14** (500 MHz,  $\text{D}_2\text{O}$ ).

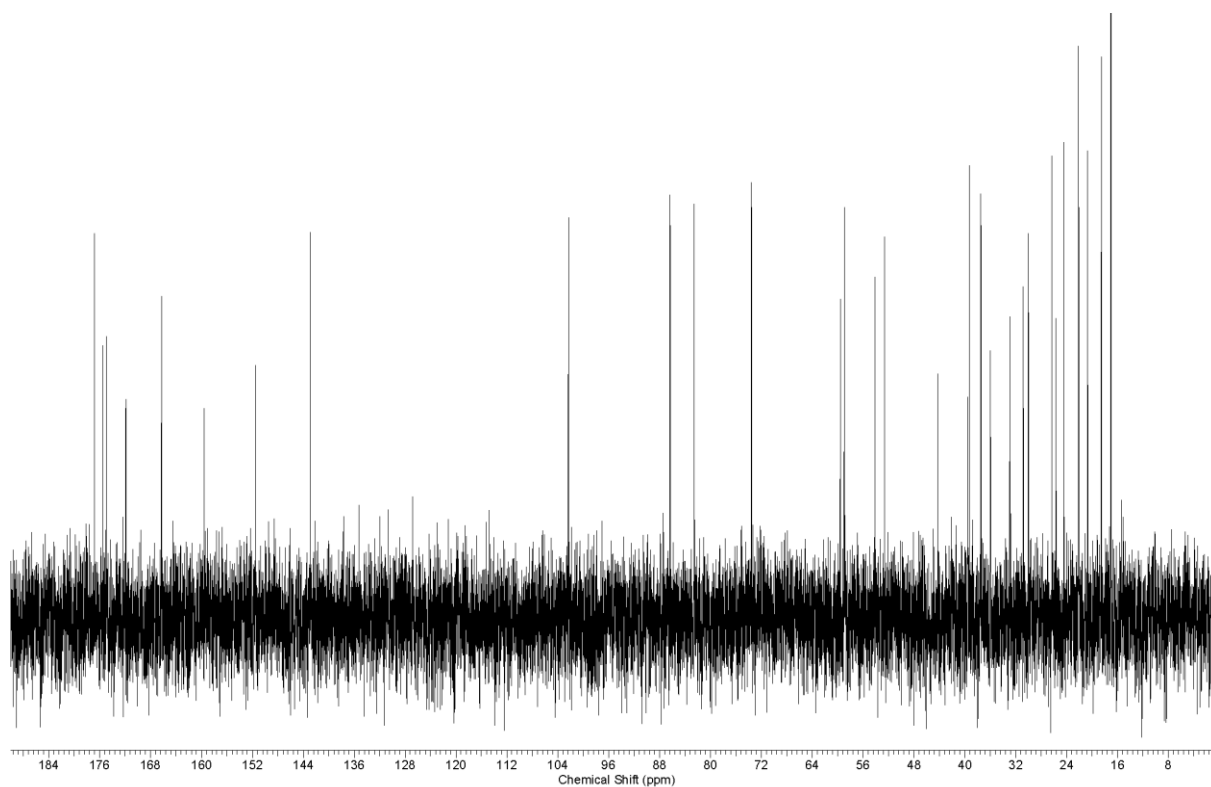

$^{13}\text{C}$  NMR spectrum of **14** (126 MHz,  $\text{D}_2\text{O}$ )

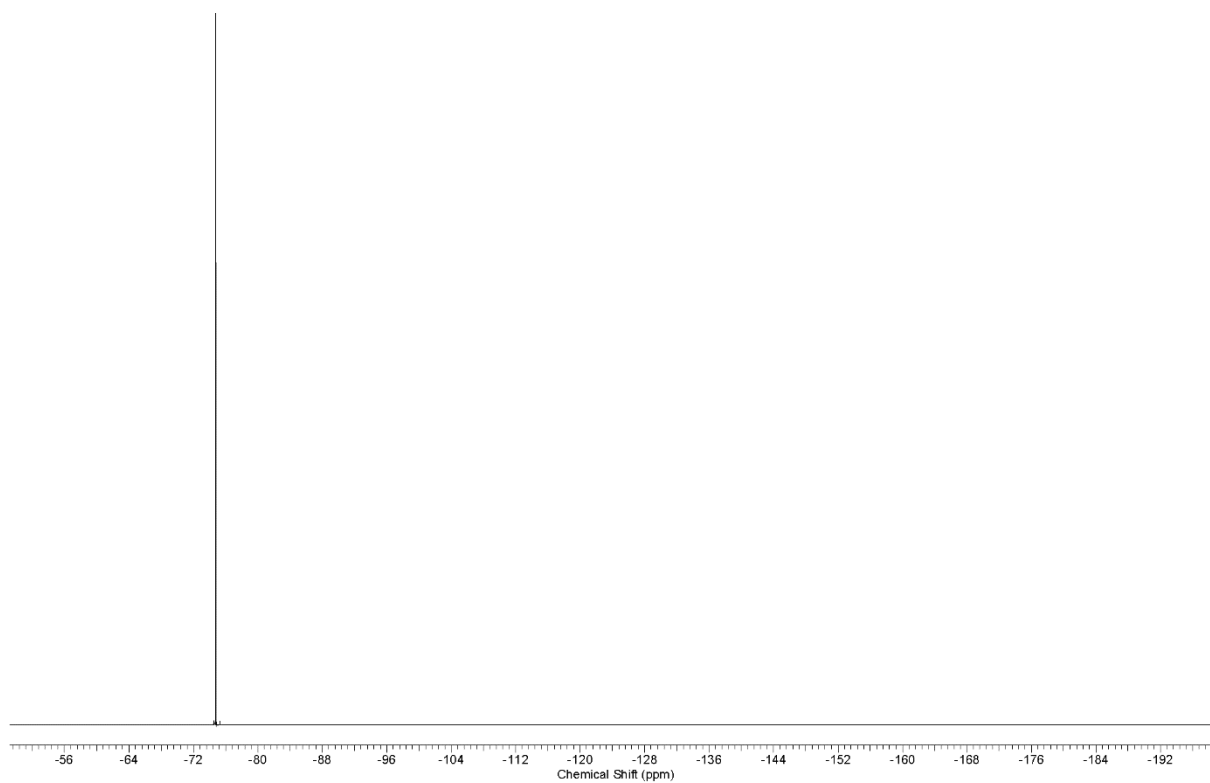

$^{19}\text{F}$  NMR spectrum of **14** (376 MHz,  $\text{D}_2\text{O}$ ).

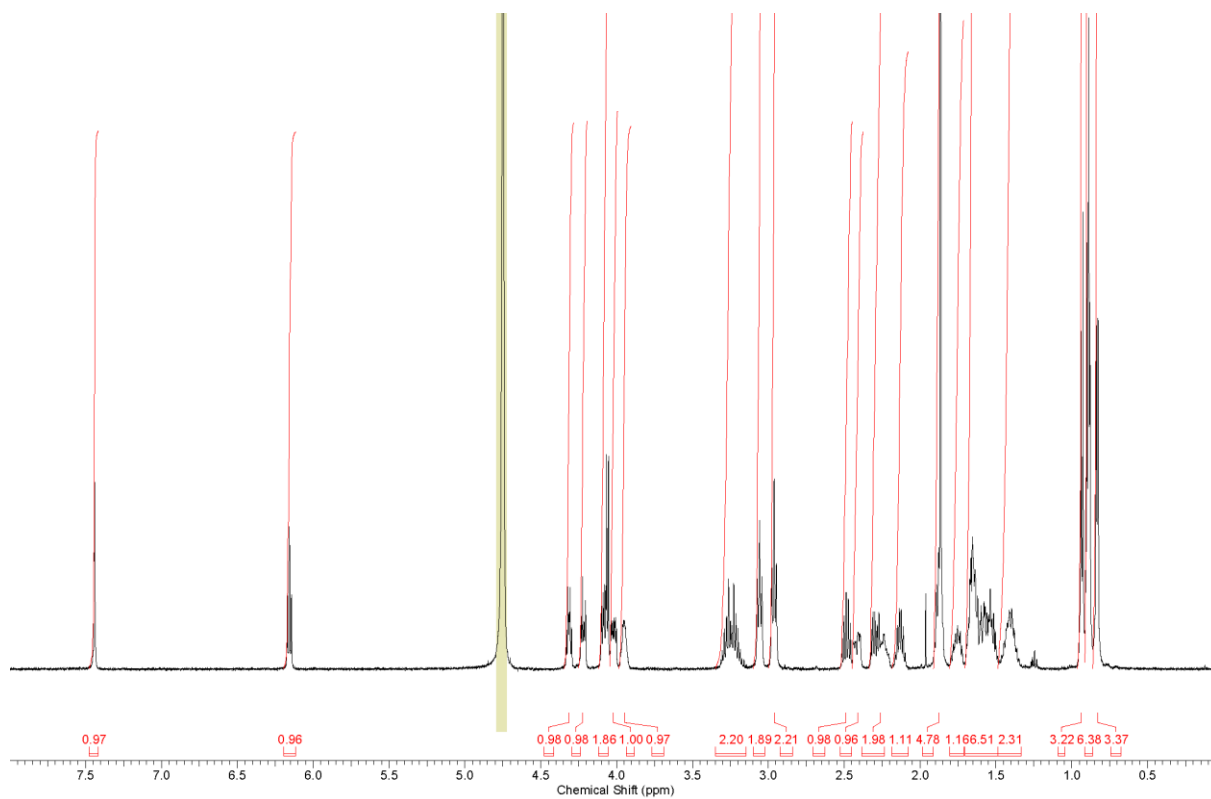

$^1\text{H}$  NMR spectrum of **15** (500 MHz,  $\text{D}_2\text{O}$ ).

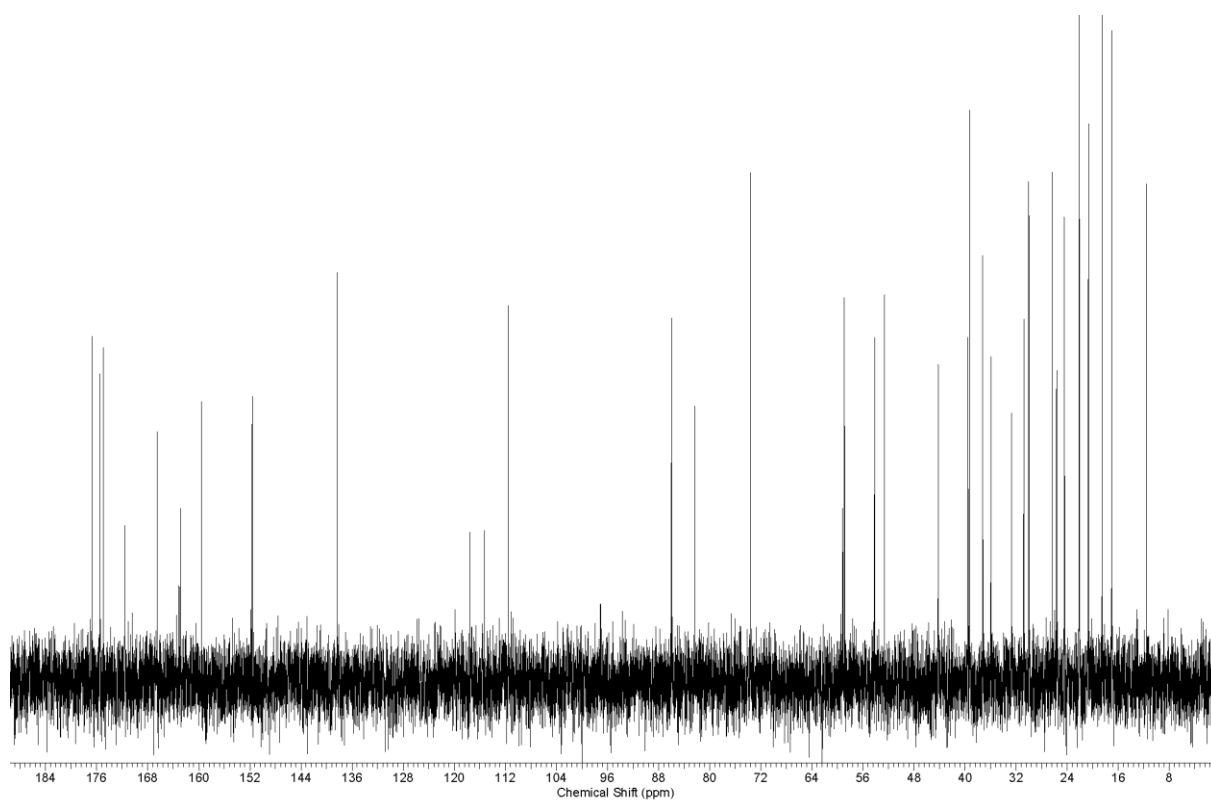

$^{13}\text{C}$  NMR spectrum of **15** (126 MHz,  $\text{D}_2\text{O}$ ).

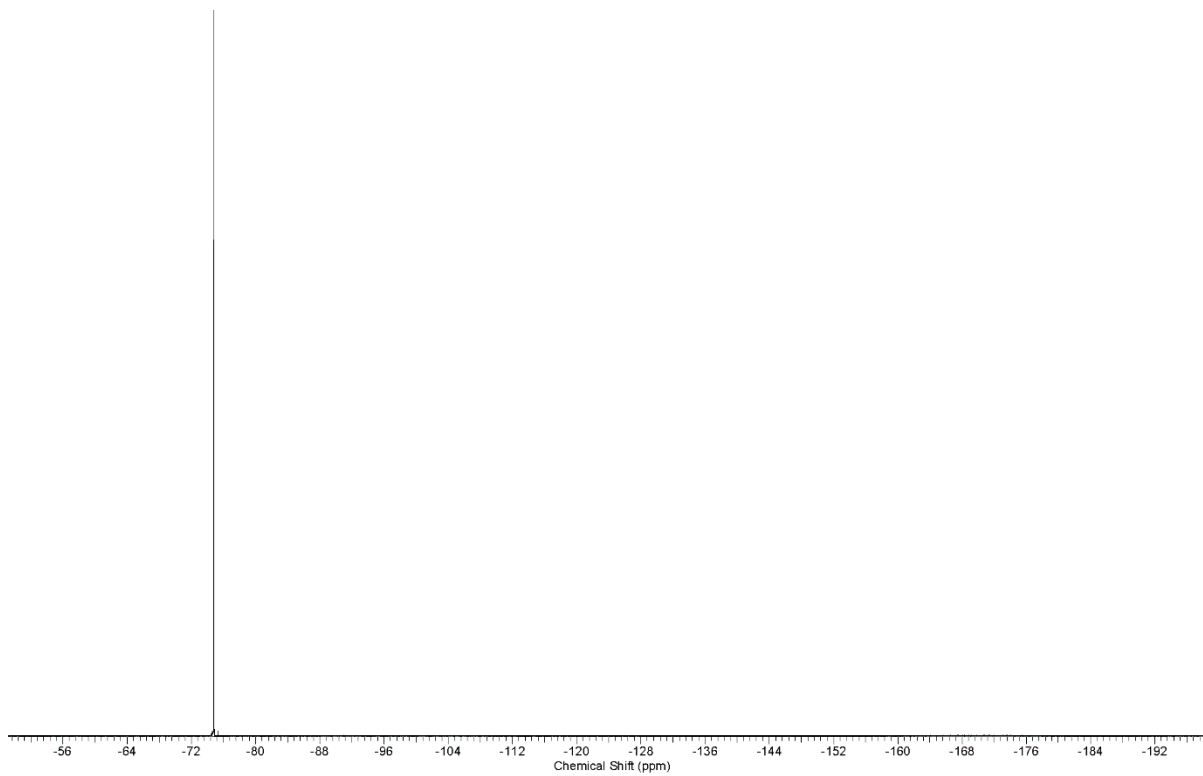

$^{19}\text{F}$  NMR spectrum of **15** (376 MHz,  $\text{D}_2\text{O}$ ).

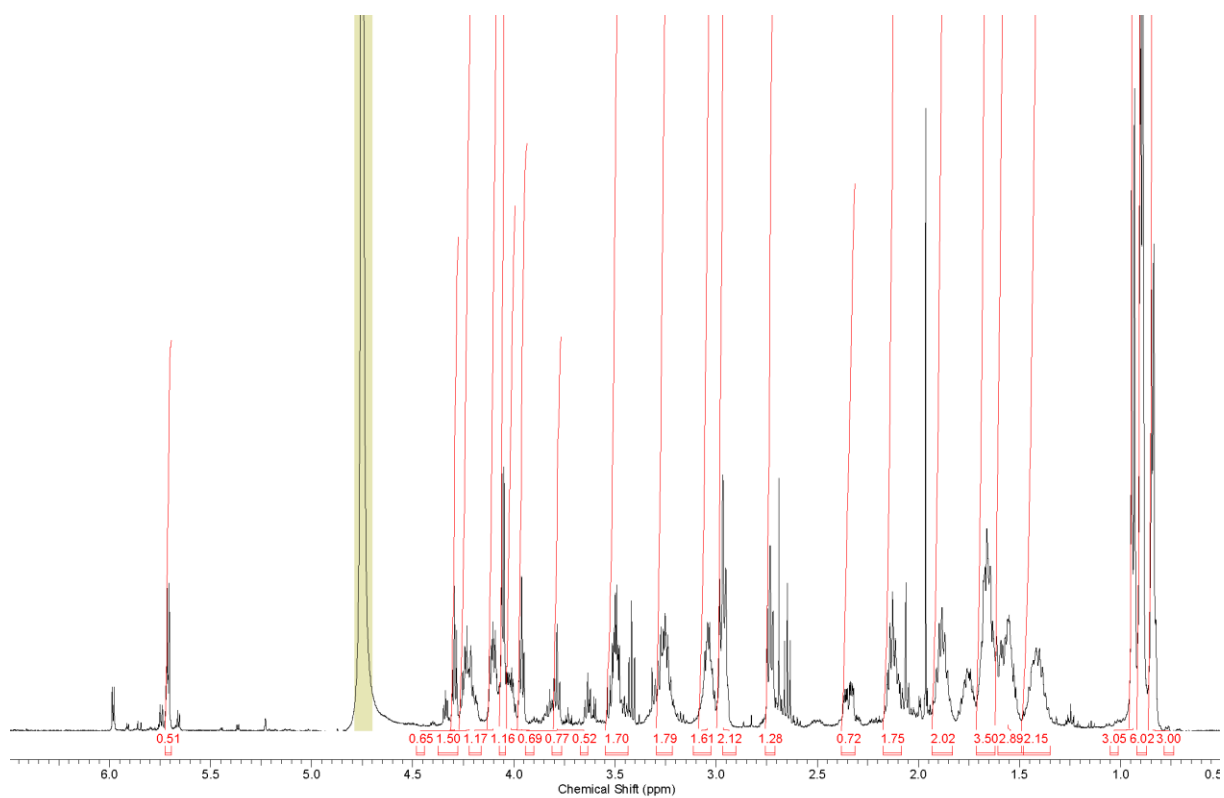

$^1\text{H}$  NMR spectrum of **16** (500 MHz,  $\text{D}_2\text{O}$ ).

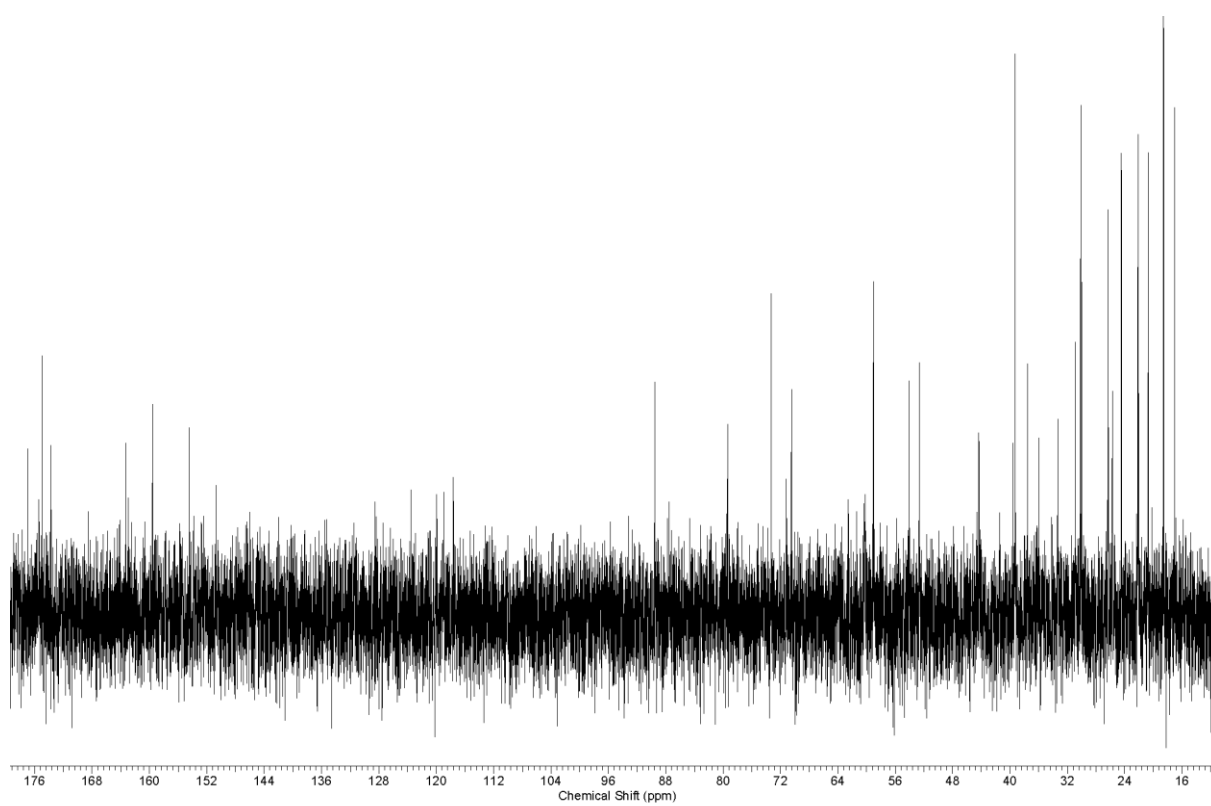

$^{13}\text{C}$  NMR spectrum of **16** (126 MHz,  $\text{D}_2\text{O}$ ).

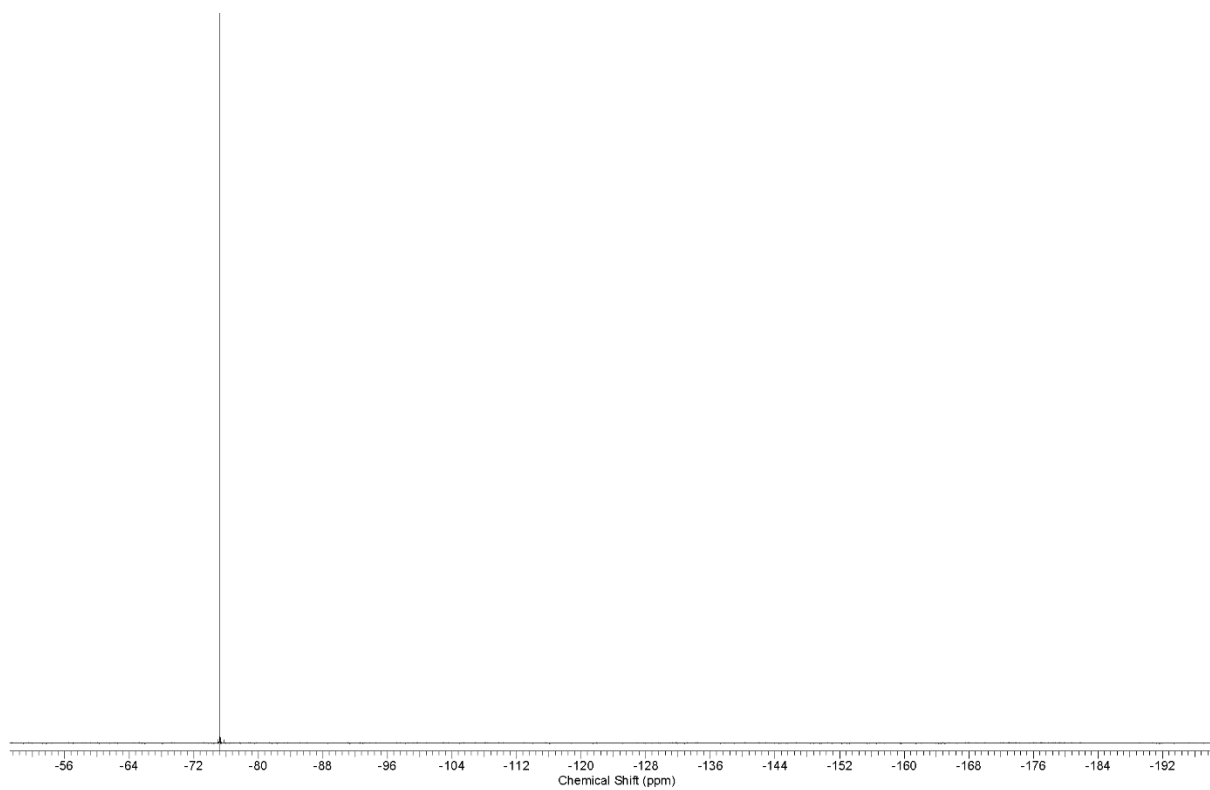

$^{19}\text{F}$  NMR spectrum of **16** (376 MHz,  $\text{D}_2\text{O}$ ).

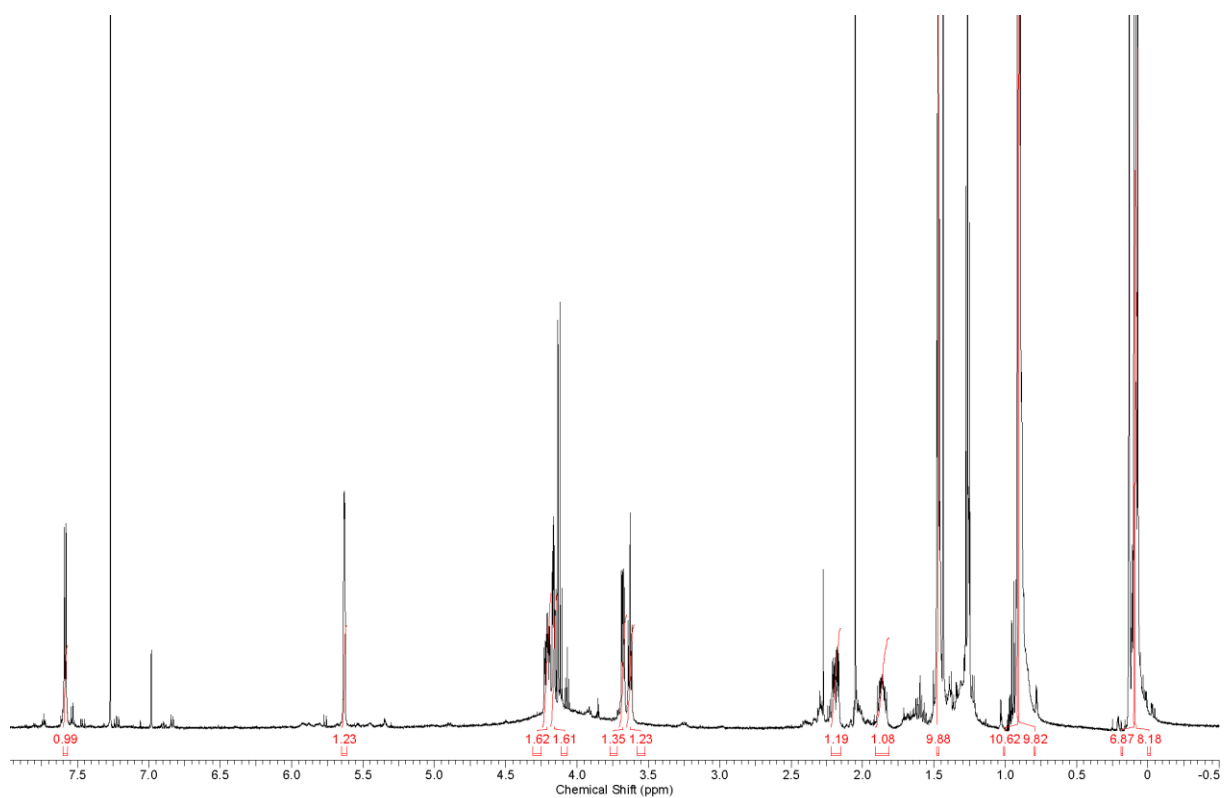

$^1\text{H}$  NMR spectrum of **18** (500 MHz,  $\text{CDCl}_3$ ).

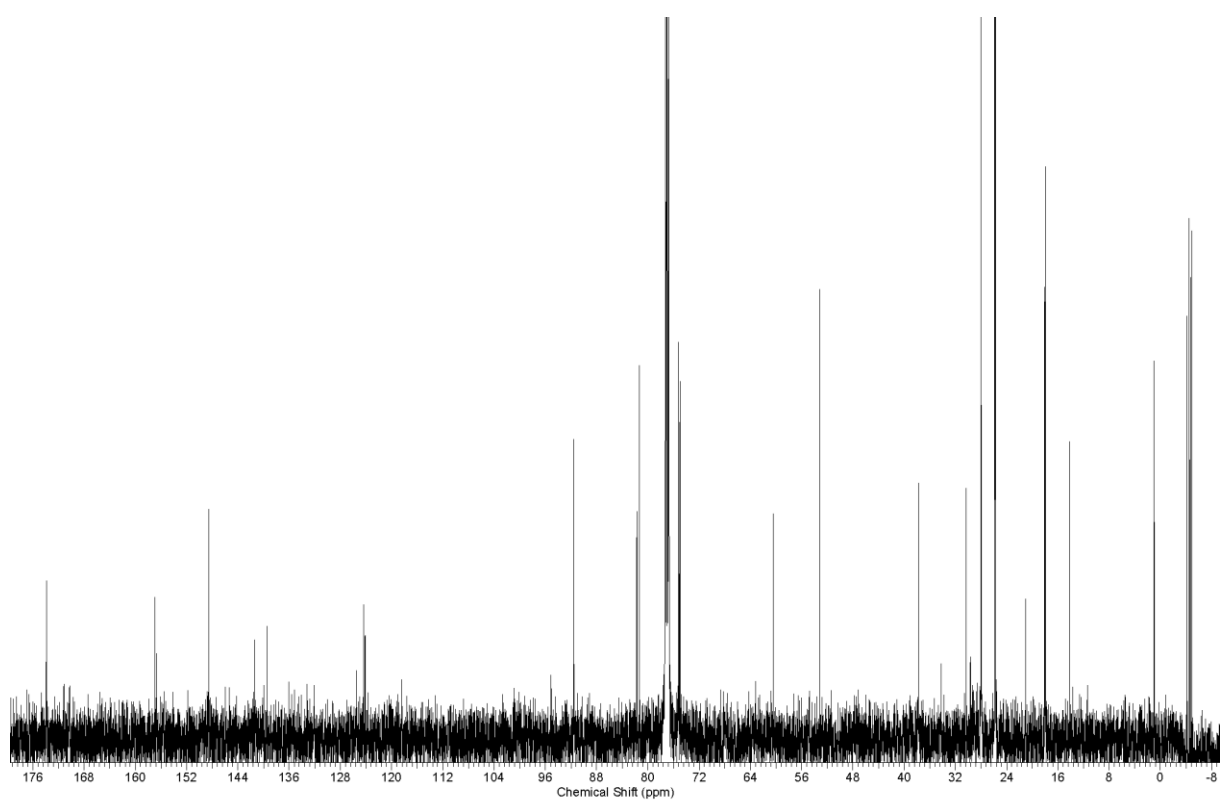

$^{13}\text{C}$  NMR spectrum of **18** (126 MHz,  $\text{CDCl}_3$ ).

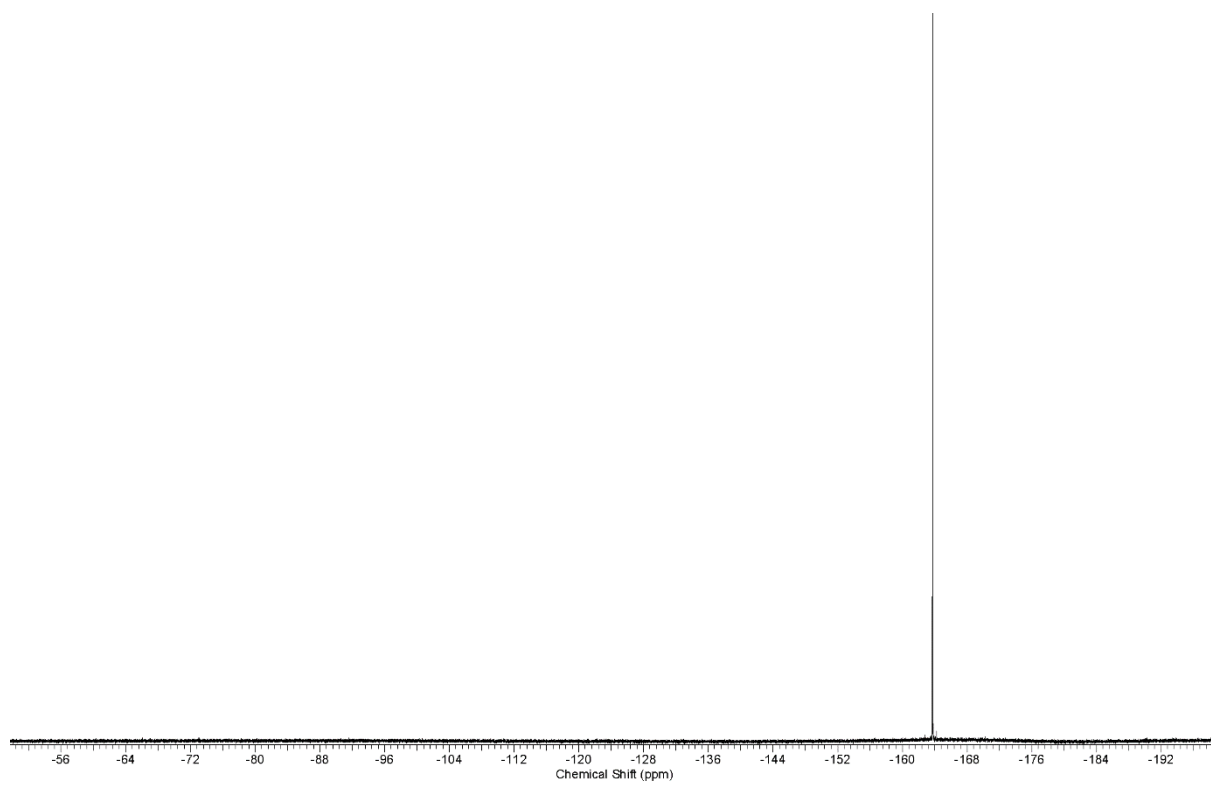

$^{19}\text{F}$  NMR spectrum of **18** (376 MHz,  $\text{CDCl}_3$ ).



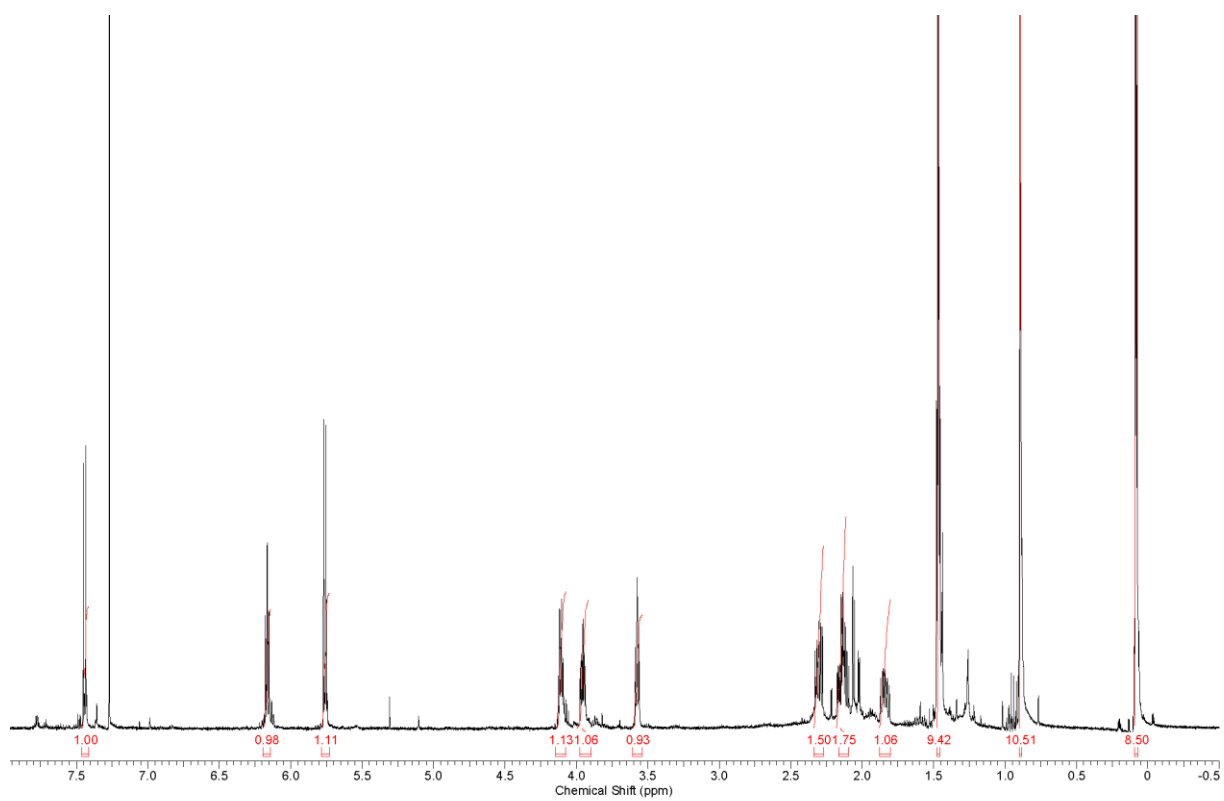

$^1\text{H}$  NMR spectrum of **19** (500 MHz,  $\text{CDCl}_3$ ).

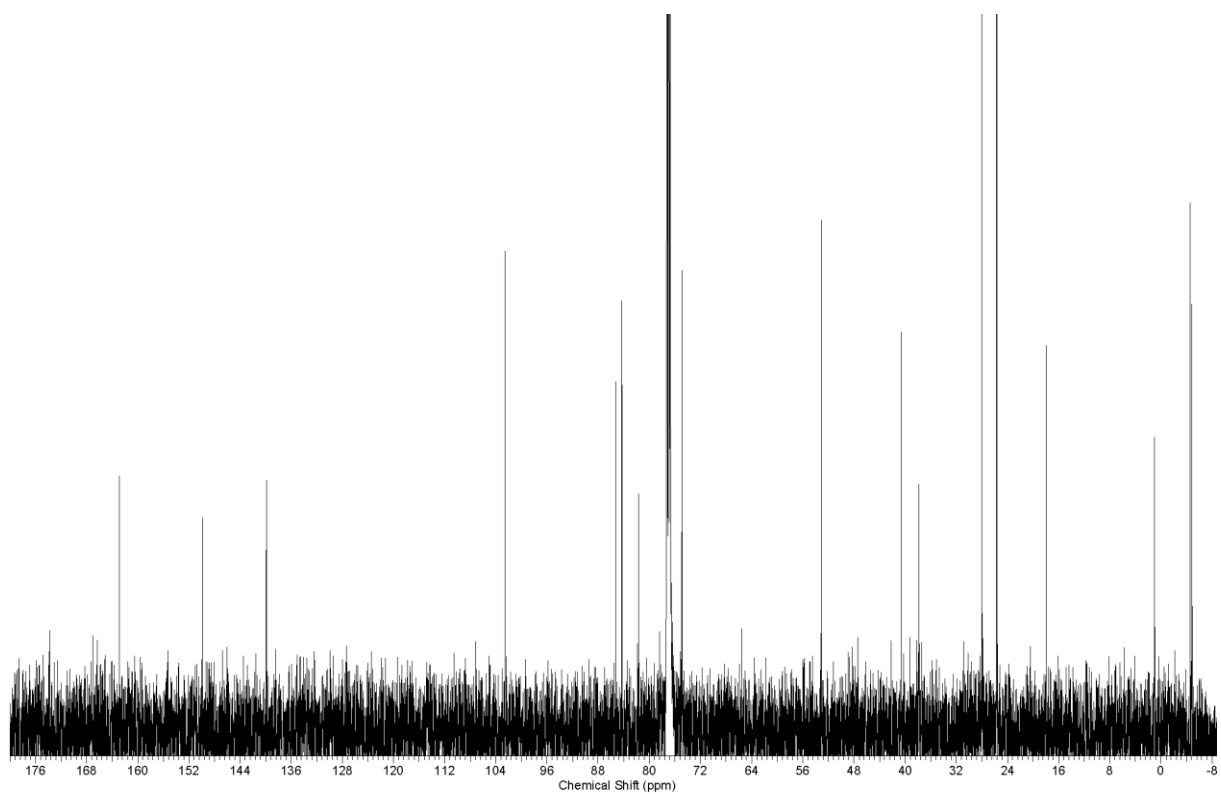

$^{13}\text{C}$  NMR spectrum of **19** (126 MHz,  $\text{CDCl}_3$ ).

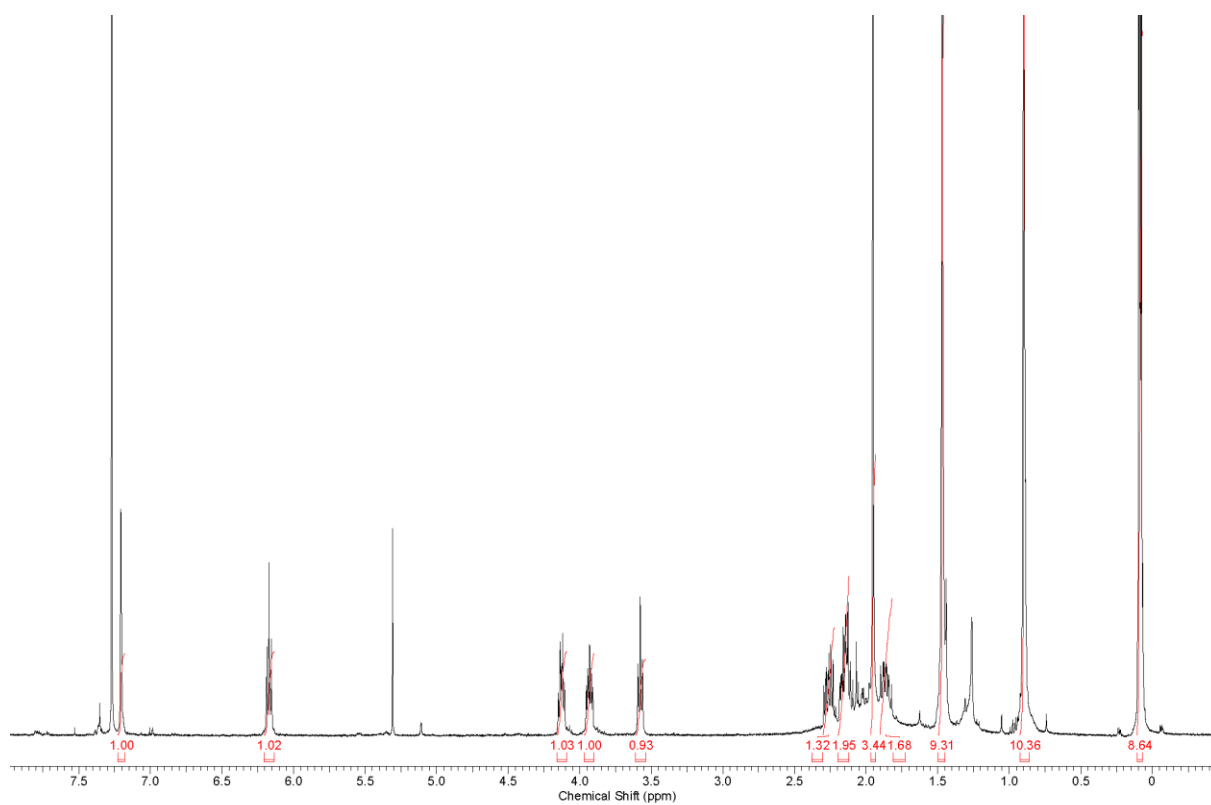

$^1\text{H}$  NMR spectrum of **20** (500 MHz,  $\text{CDCl}_3$ ).

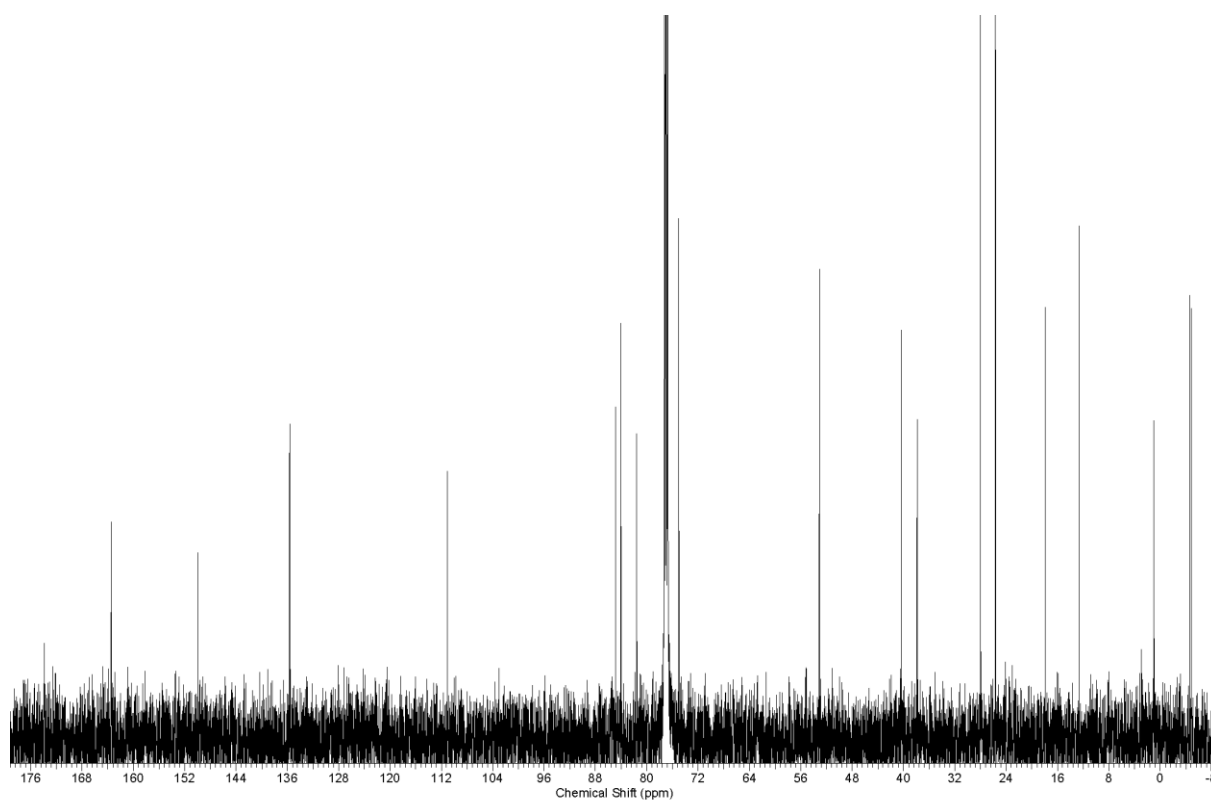

$^{13}\text{C}$  NMR spectrum of **20** (126 MHz,  $\text{CDCl}_3$ ).

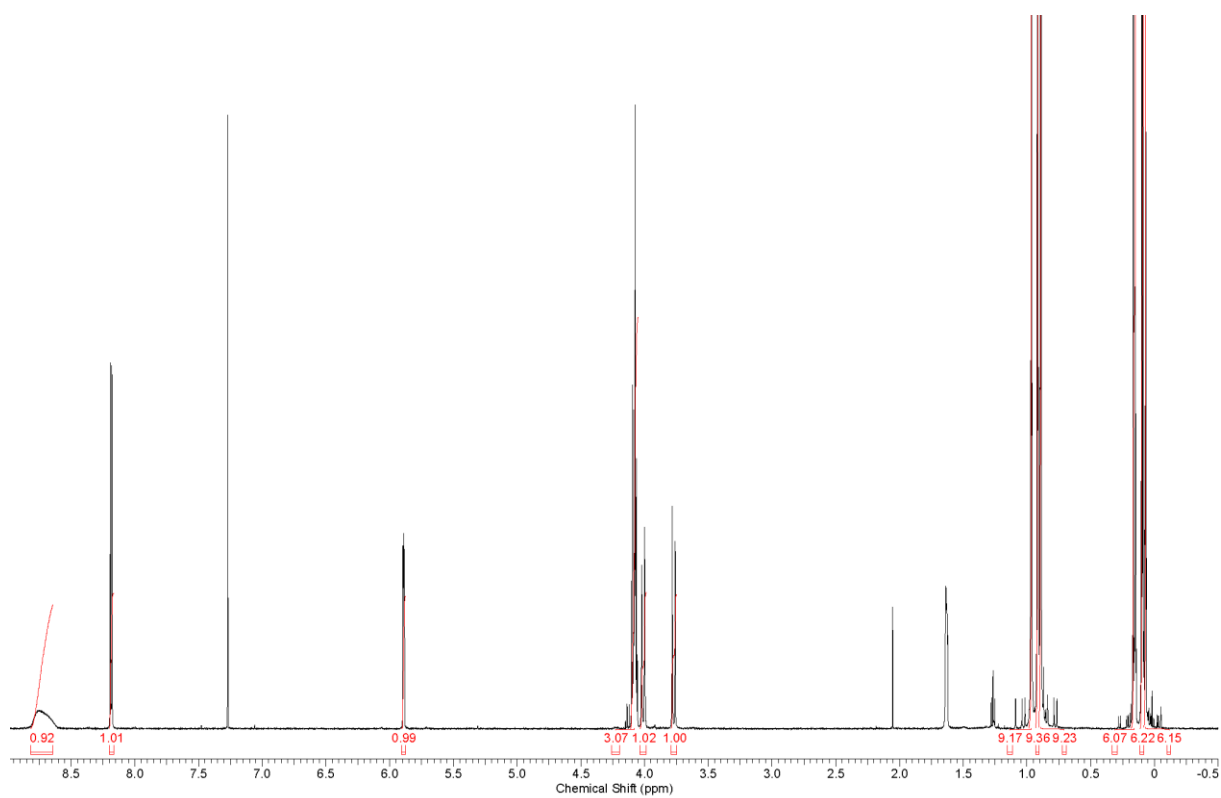

$^1\text{H}$  NMR spectrum of **24** (500 MHz,  $\text{CDCl}_3$ ).

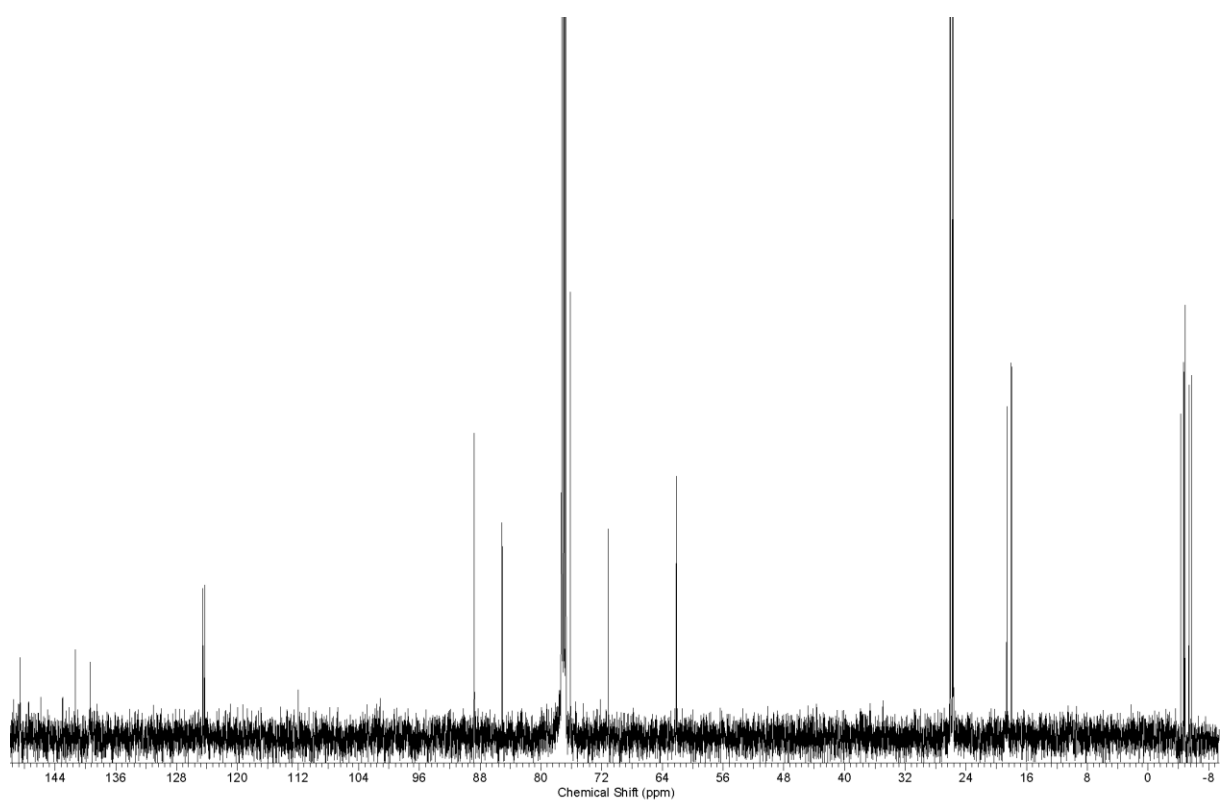

$^{13}\text{C}$  NMR spectrum of **24** (126 MHz,  $\text{CDCl}_3$ ).

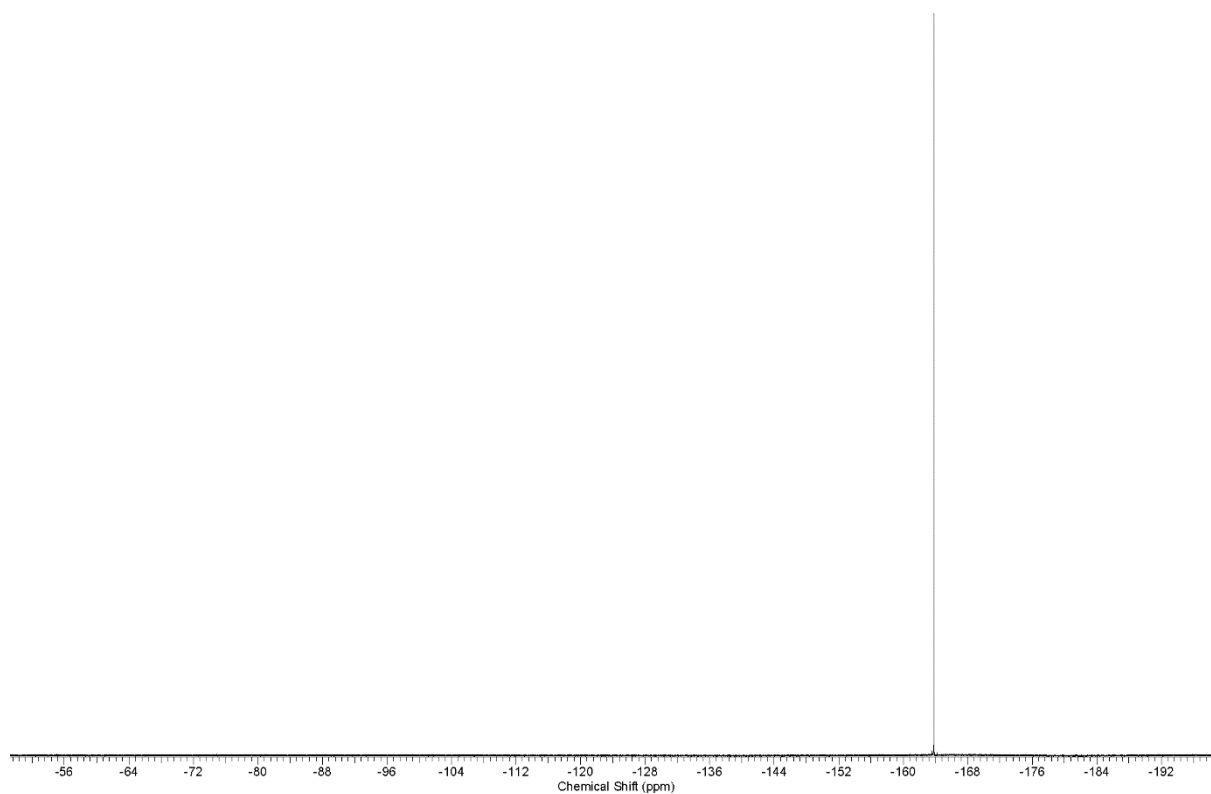

$^{19}\text{F}$  NMR spectrum of **24** (376 MHz,  $\text{CDCl}_3$ ).

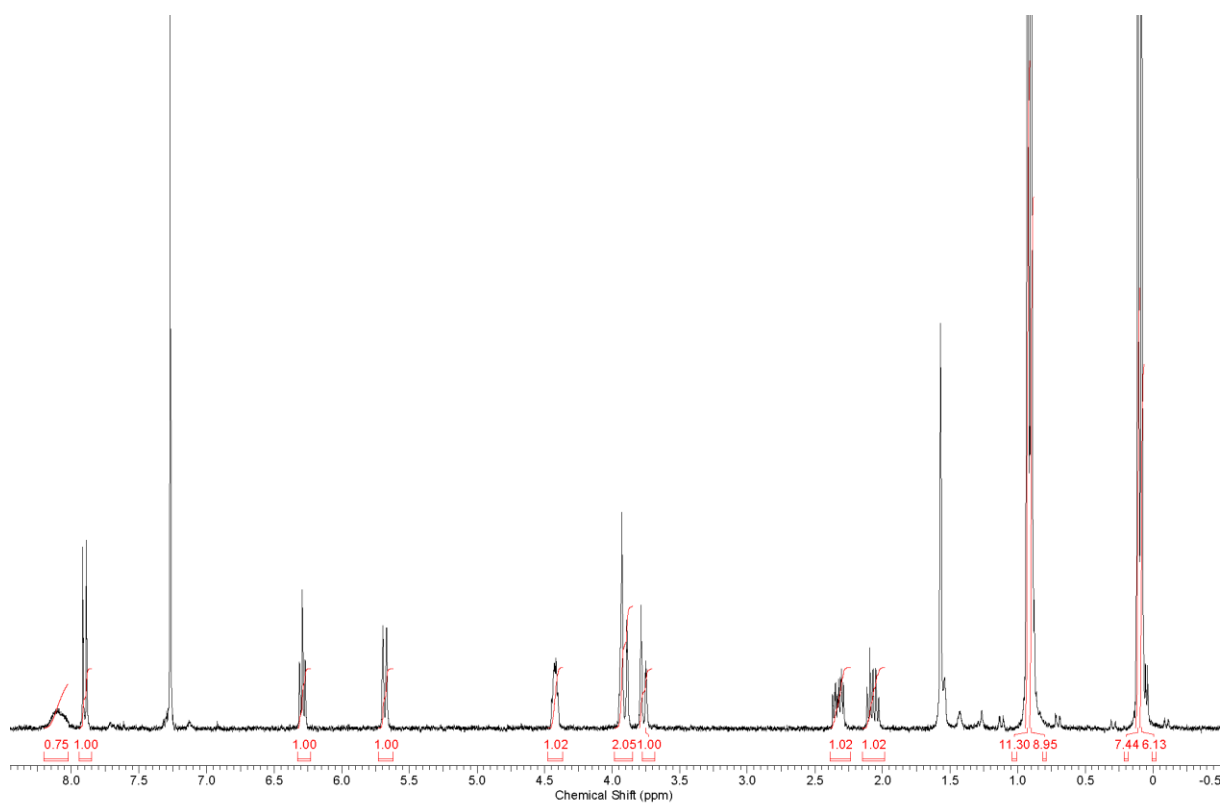

$^1\text{H}$  NMR spectrum of **25** (300 MHz,  $\text{CDCl}_3$ ).

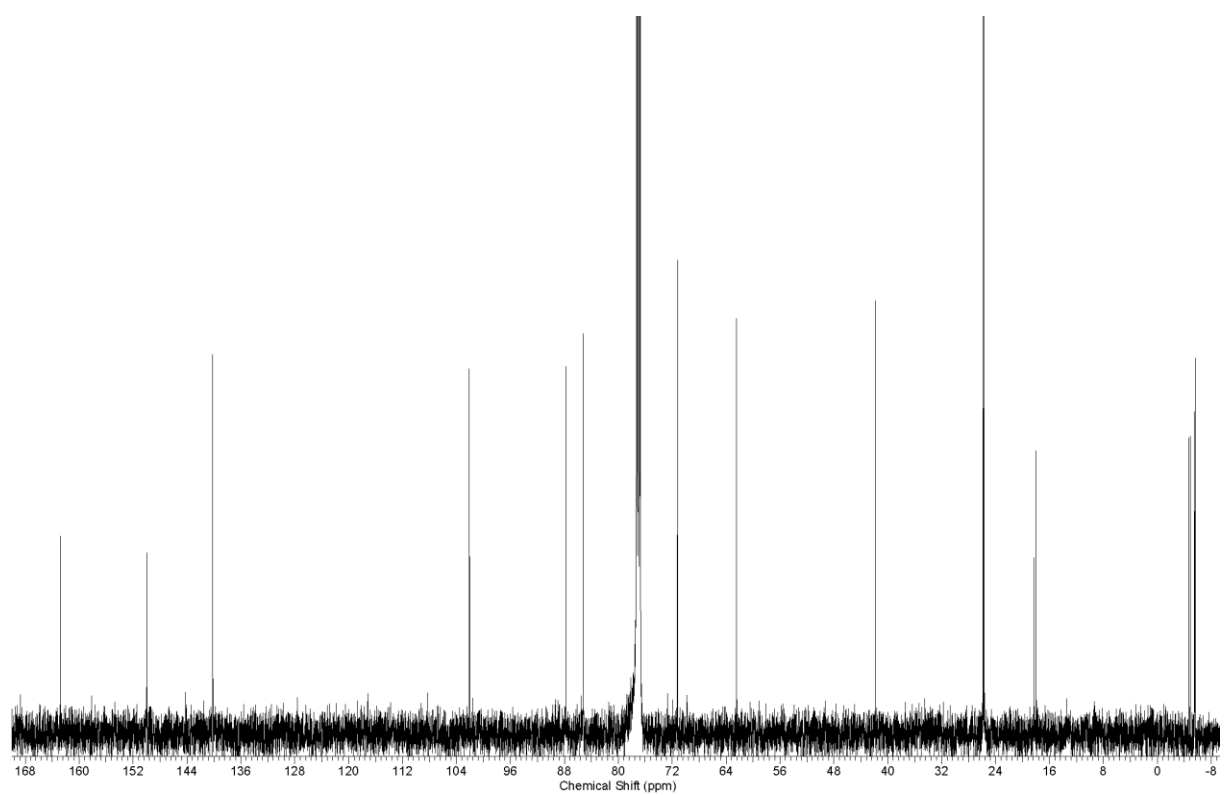

$^{13}\text{C}$  NMR spectrum of **25** (126 MHz,  $\text{CDCl}_3$ ).

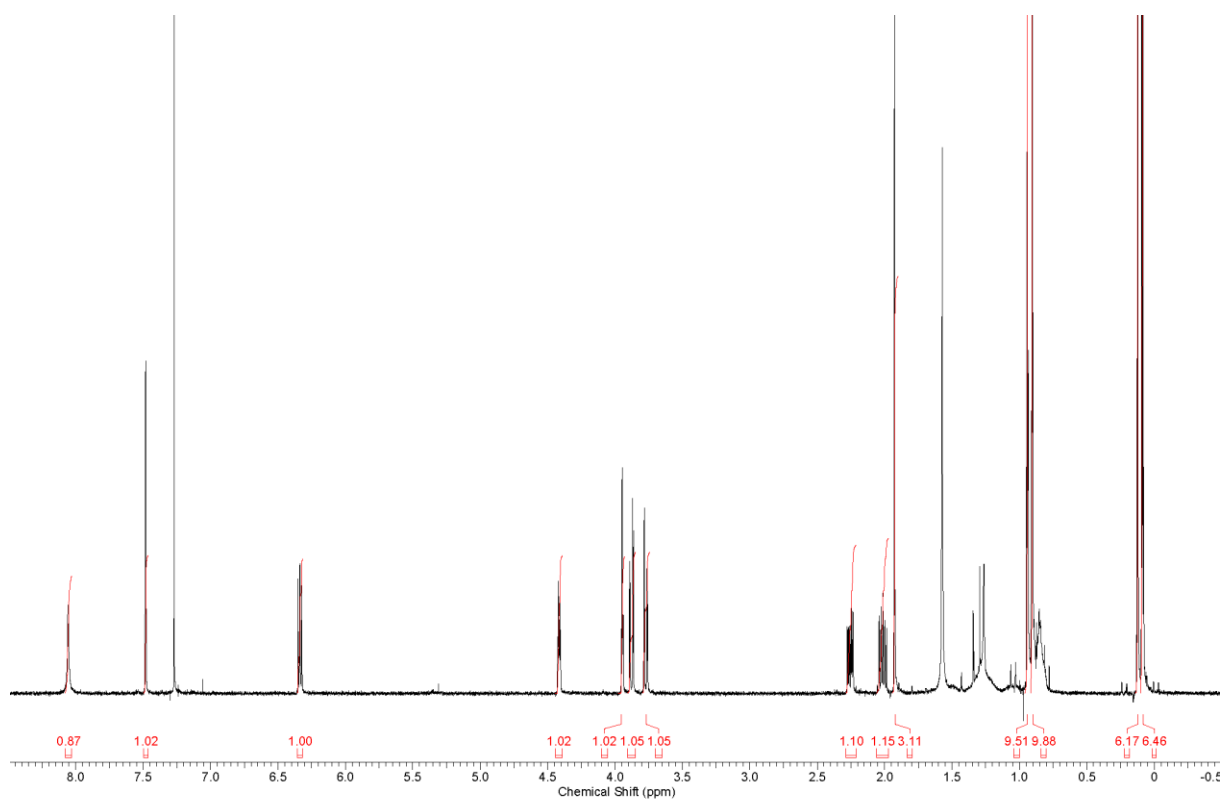

$^1\text{H}$  NMR spectrum of **26** (300 MHz,  $\text{CDCl}_3$ ).

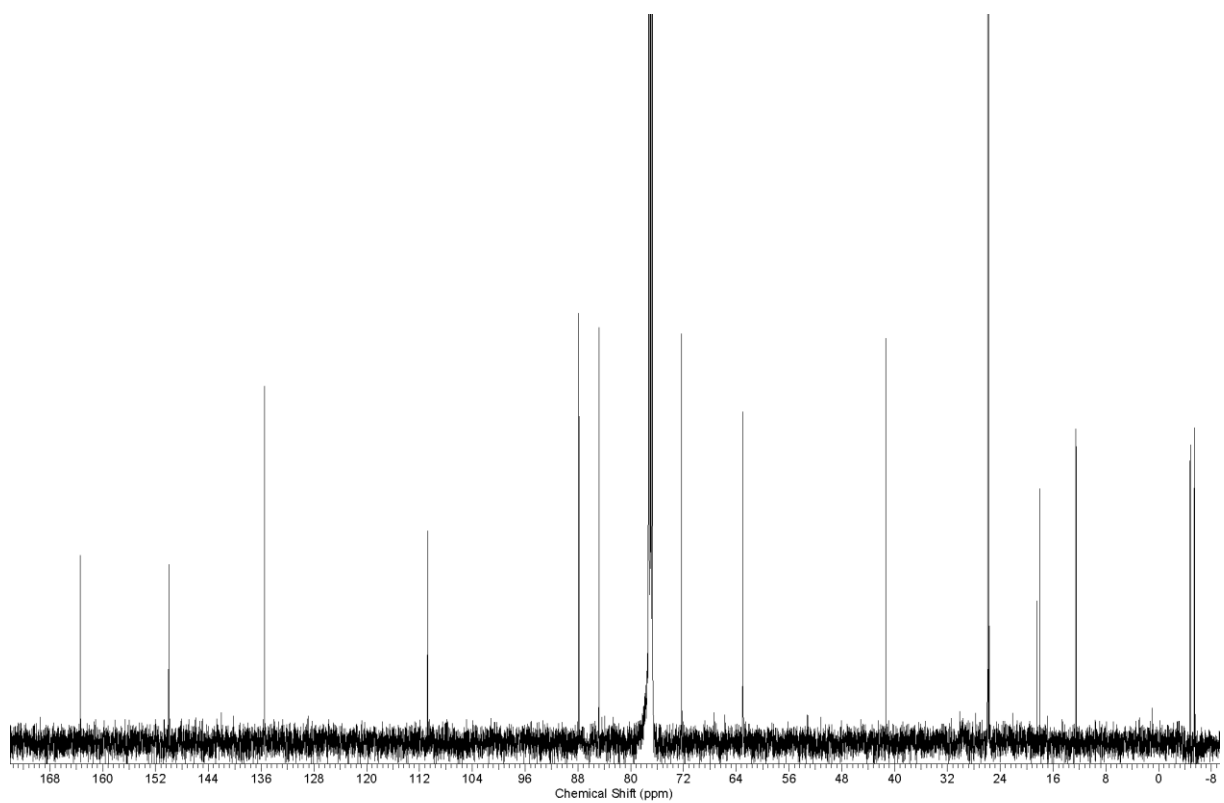

$^{13}\text{C}$  NMR spectrum of **26** (126 MHz,  $\text{CDCl}_3$ ).

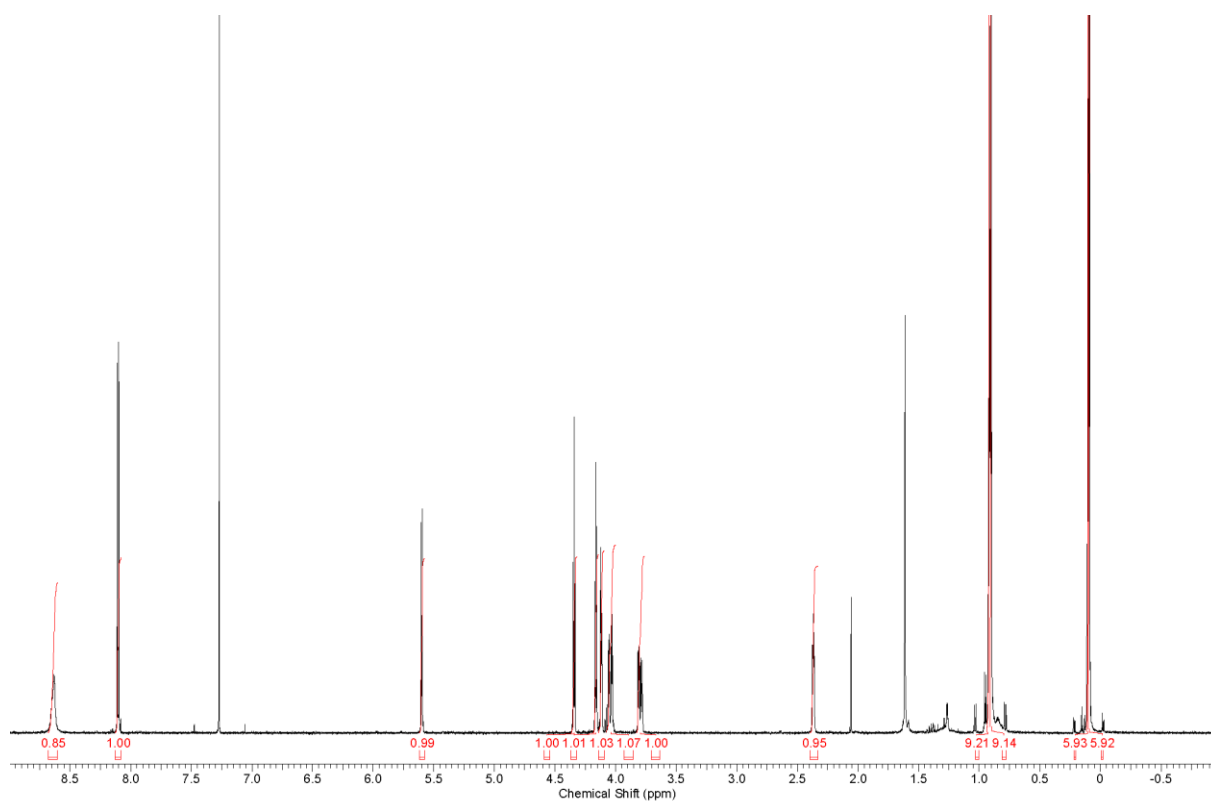

$^1\text{H}$  NMR spectrum of **27** (500 MHz,  $\text{CDCl}_3$ ).

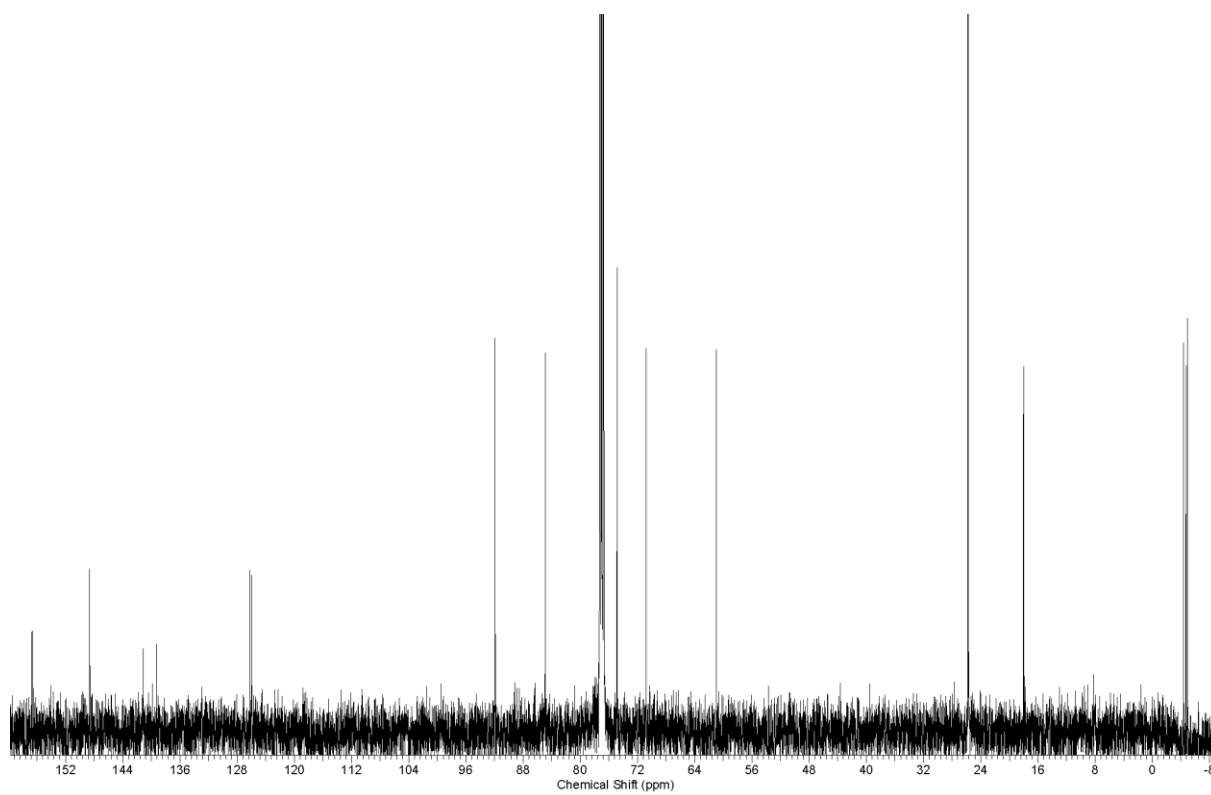

$^{13}\text{C}$  NMR spectrum of **27** (126 MHz,  $\text{CDCl}_3$ ).

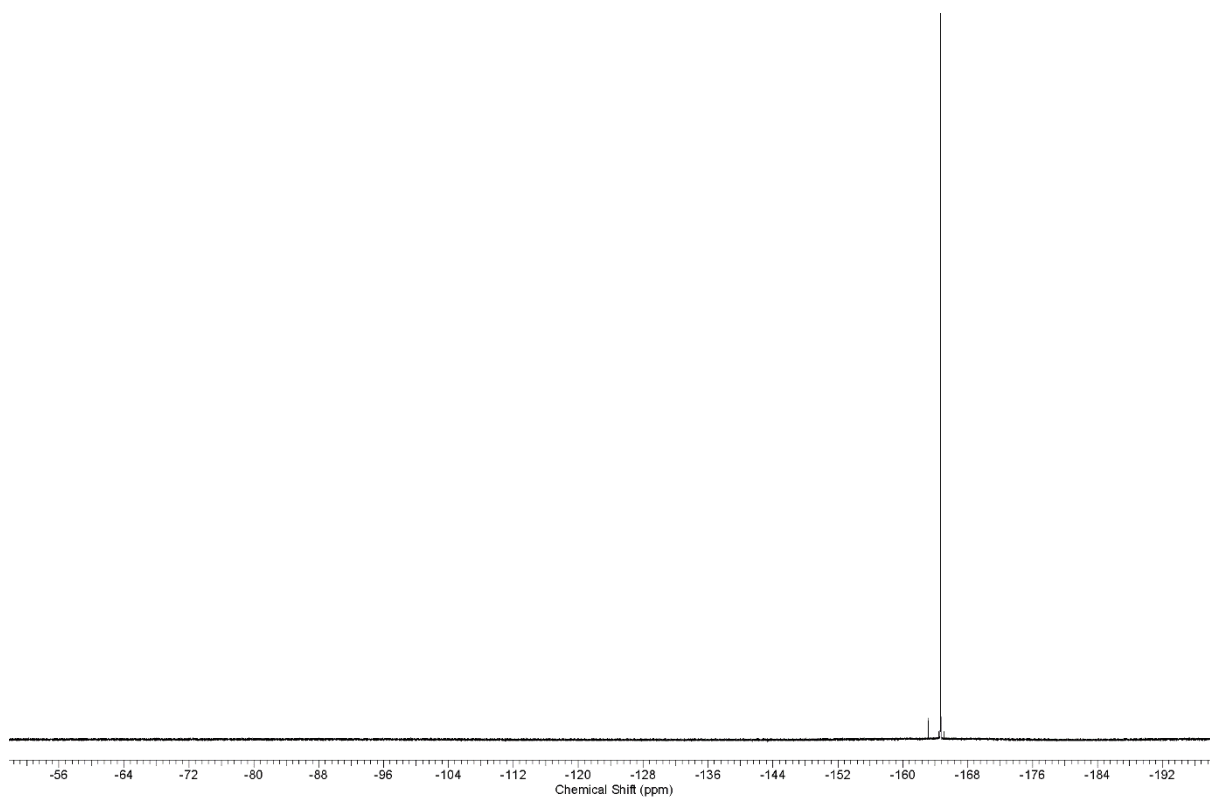

$^{19}\text{F}$  NMR spectrum of **27** (376 MHz,  $\text{CDCl}_3$ ).



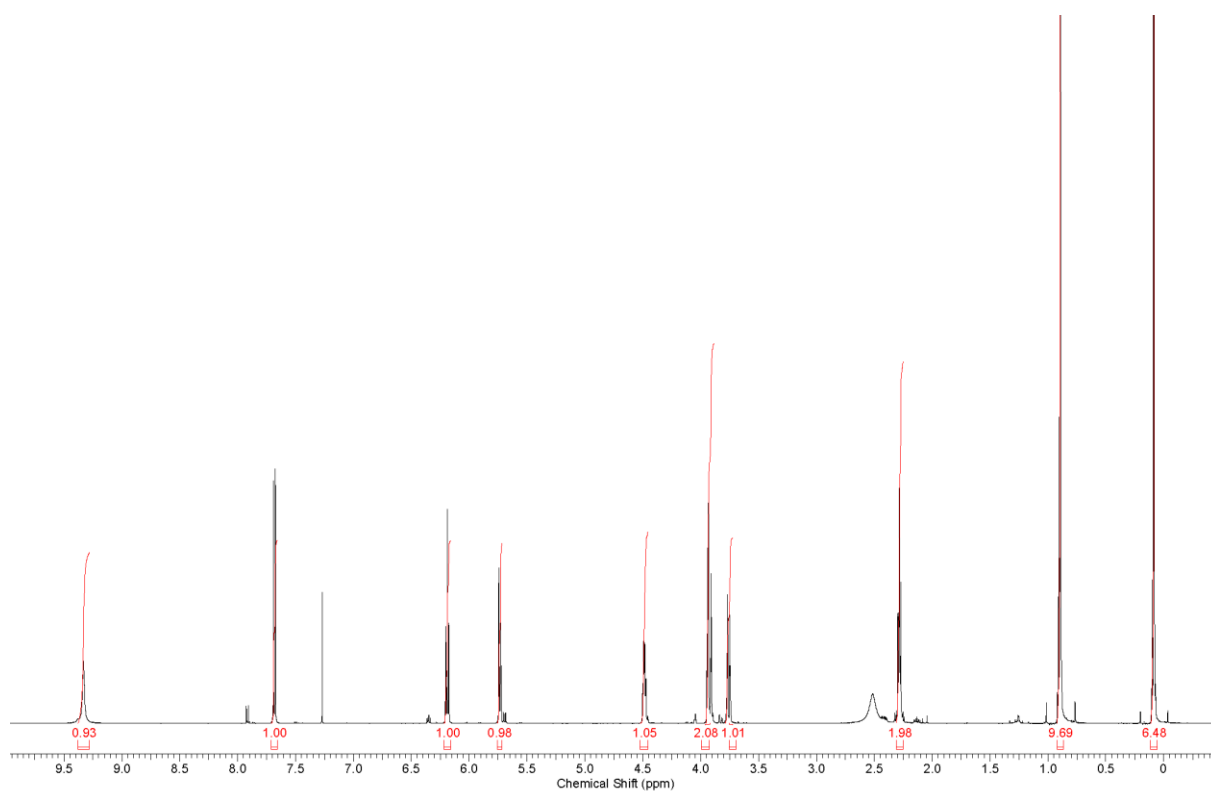

$^1\text{H}$  NMR spectrum of **28** (500 MHz,  $\text{CDCl}_3$ ).

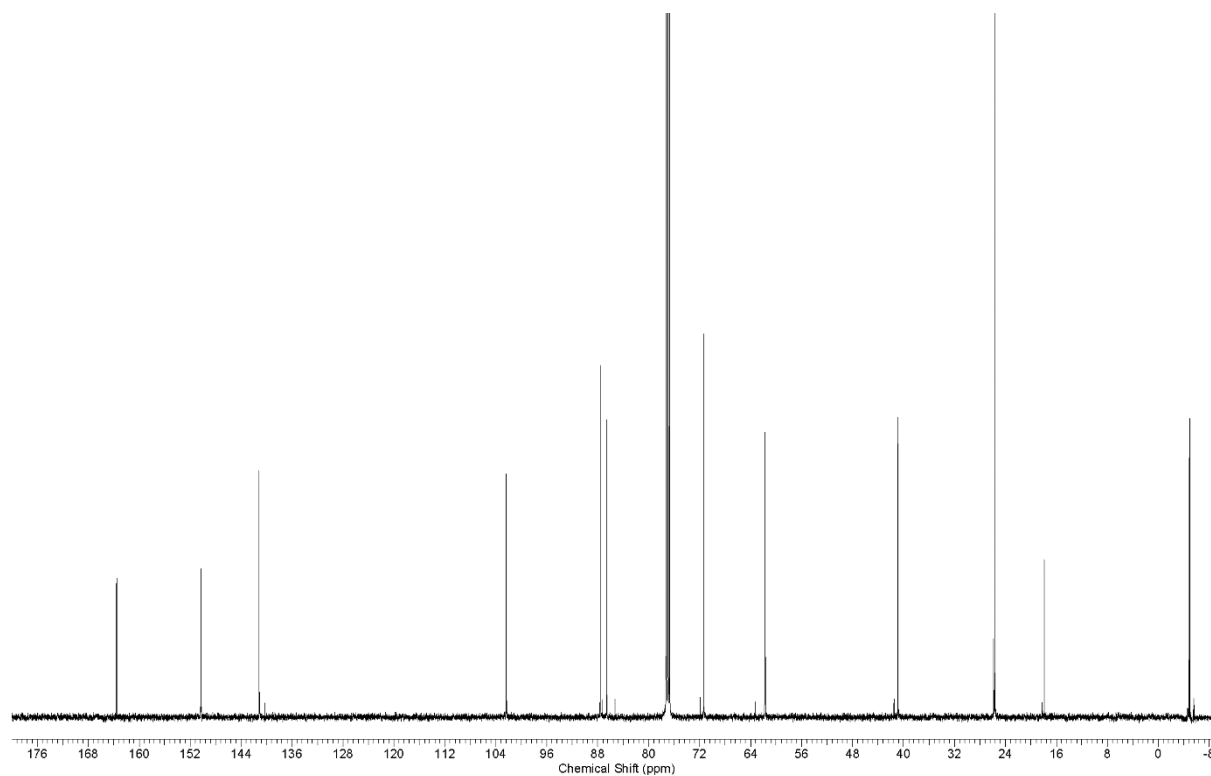

$^{13}\text{C}$  NMR spectrum of **28** (126 MHz,  $\text{CDCl}_3$ ).

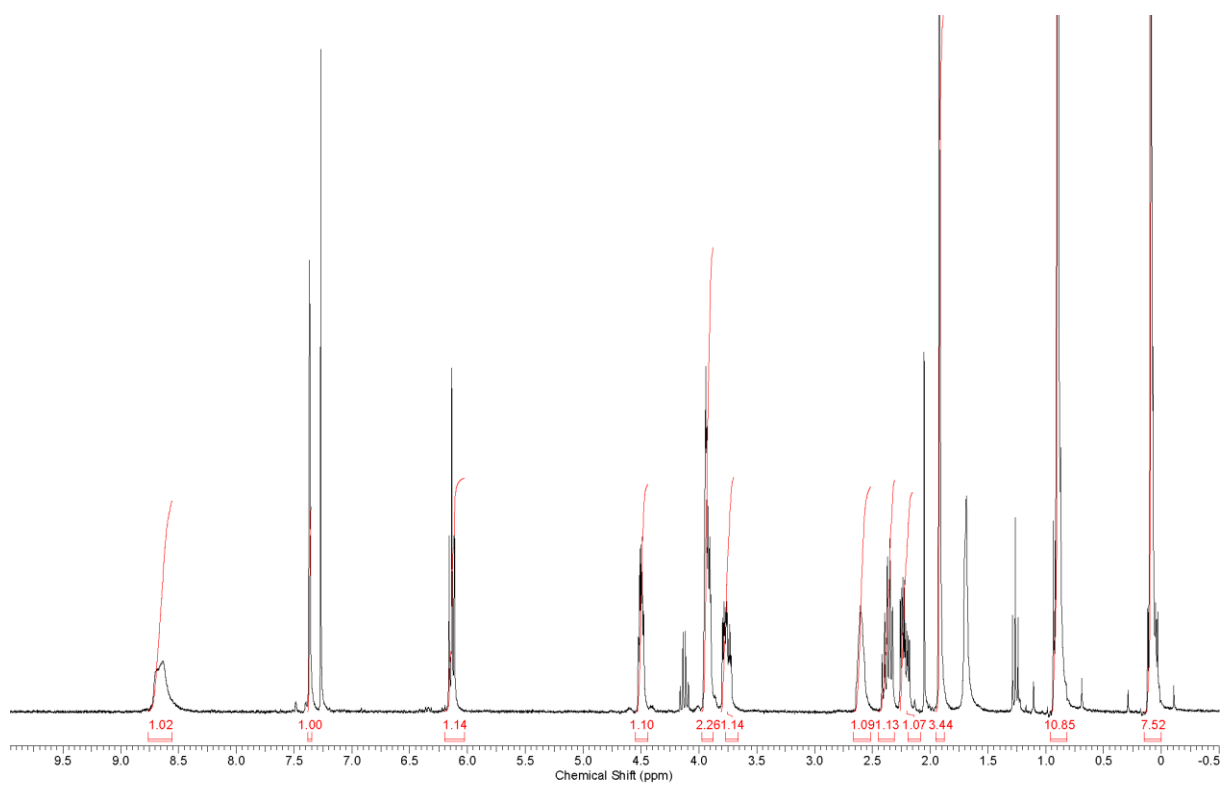

$^1\text{H}$  NMR spectrum of **29** (500 MHz,  $\text{CDCl}_3$ ).

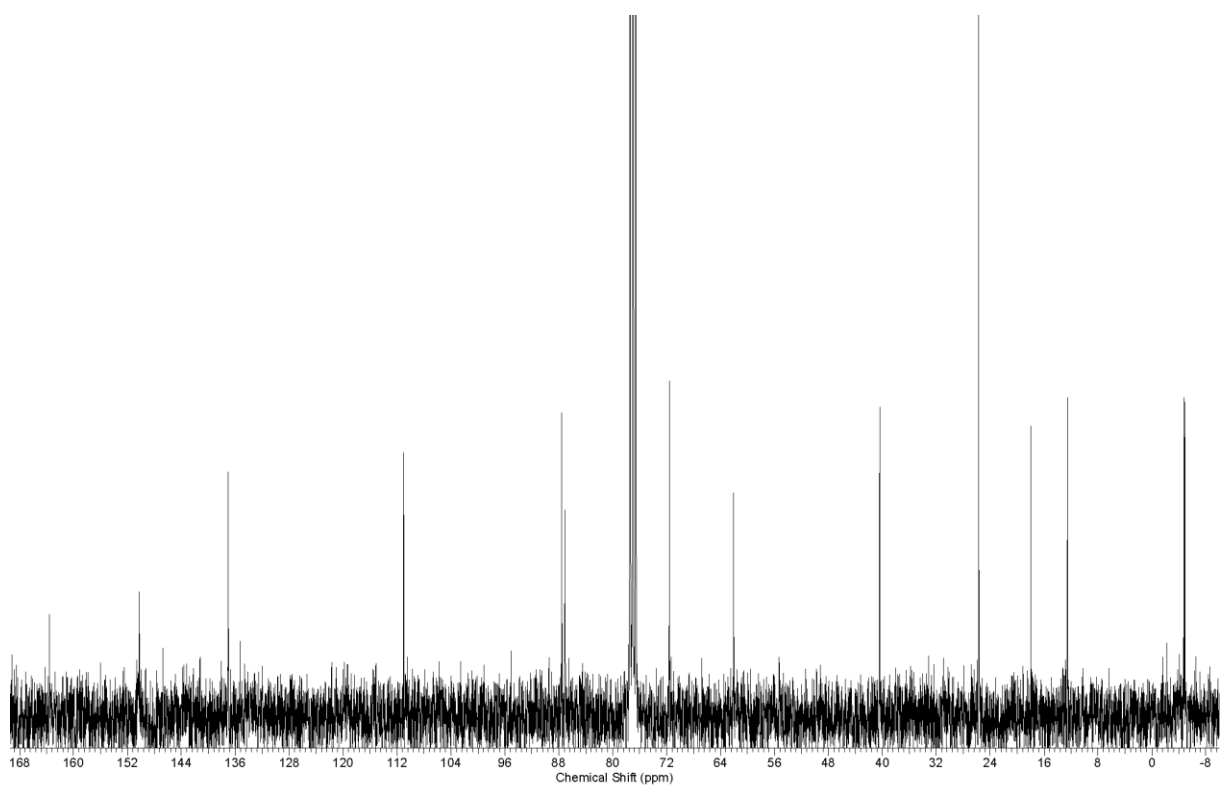

$^{13}\text{C}$  NMR spectrum of **29** (126 MHz,  $\text{CDCl}_3$ ).

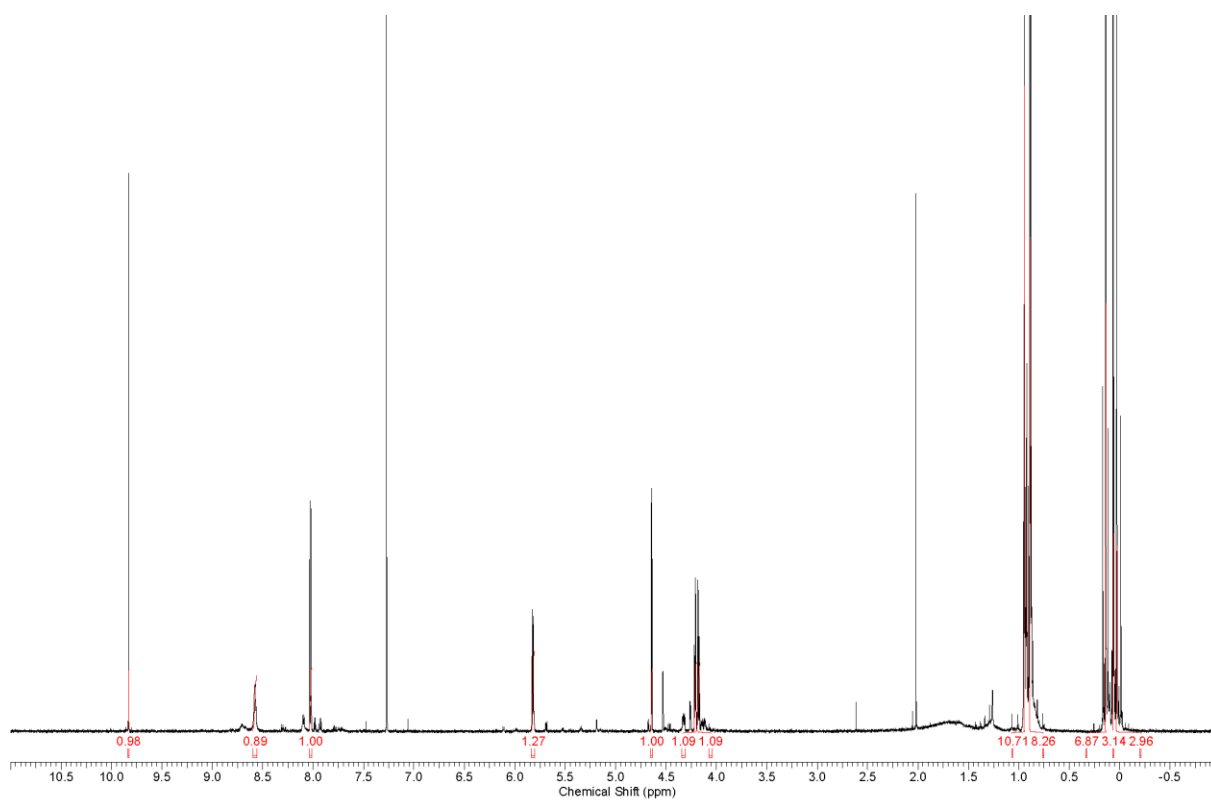

$^1\text{H}$  NMR spectrum of **30** (500 MHz,  $\text{CDCl}_3$ ).

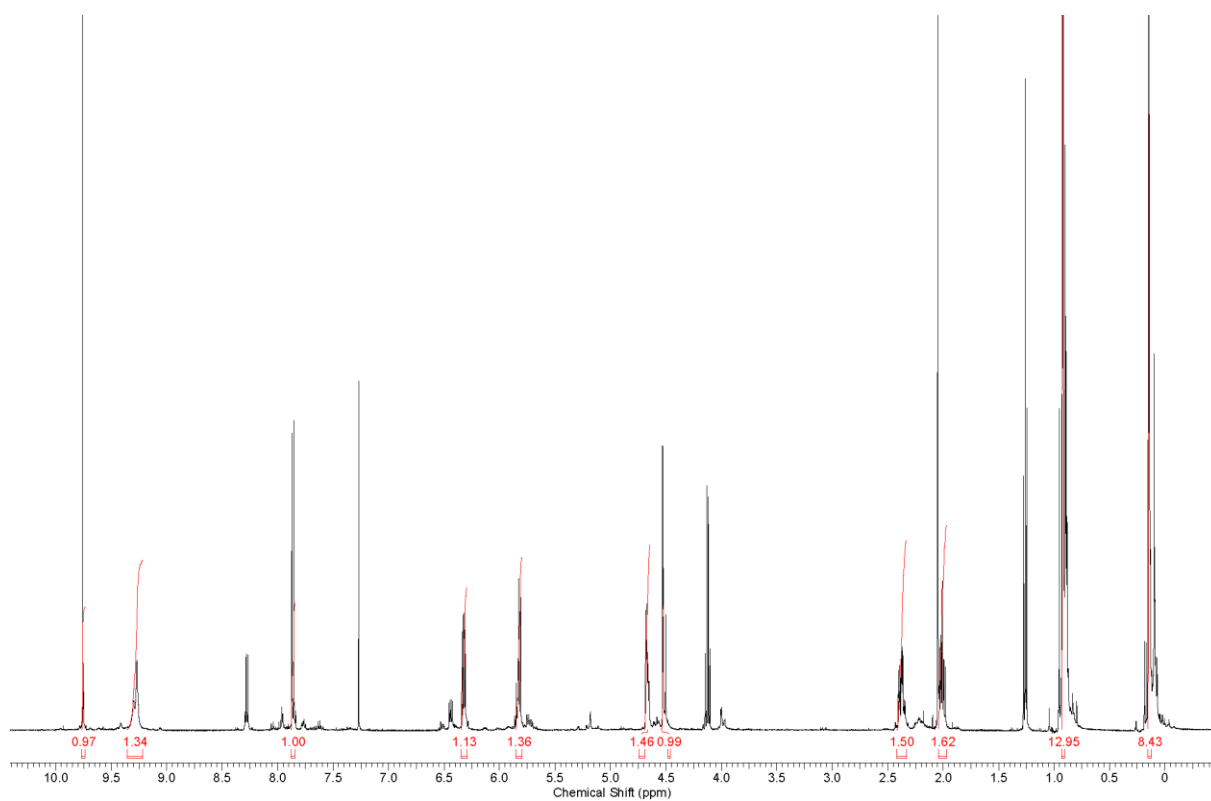

$^1\text{H}$  NMR spectrum of **31** (500 MHz,  $\text{CDCl}_3$ ).

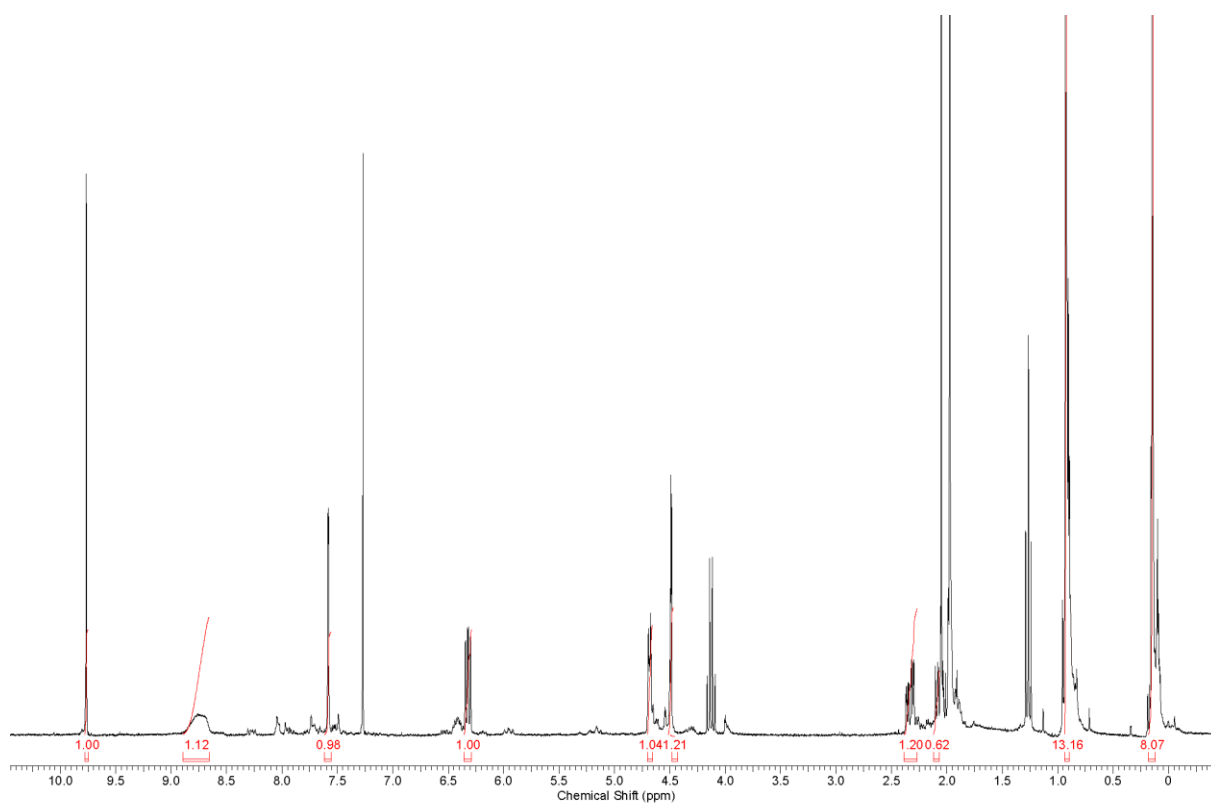

$^1\text{H}$  NMR spectrum of **32** (500 MHz,  $\text{CDCl}_3$ ).

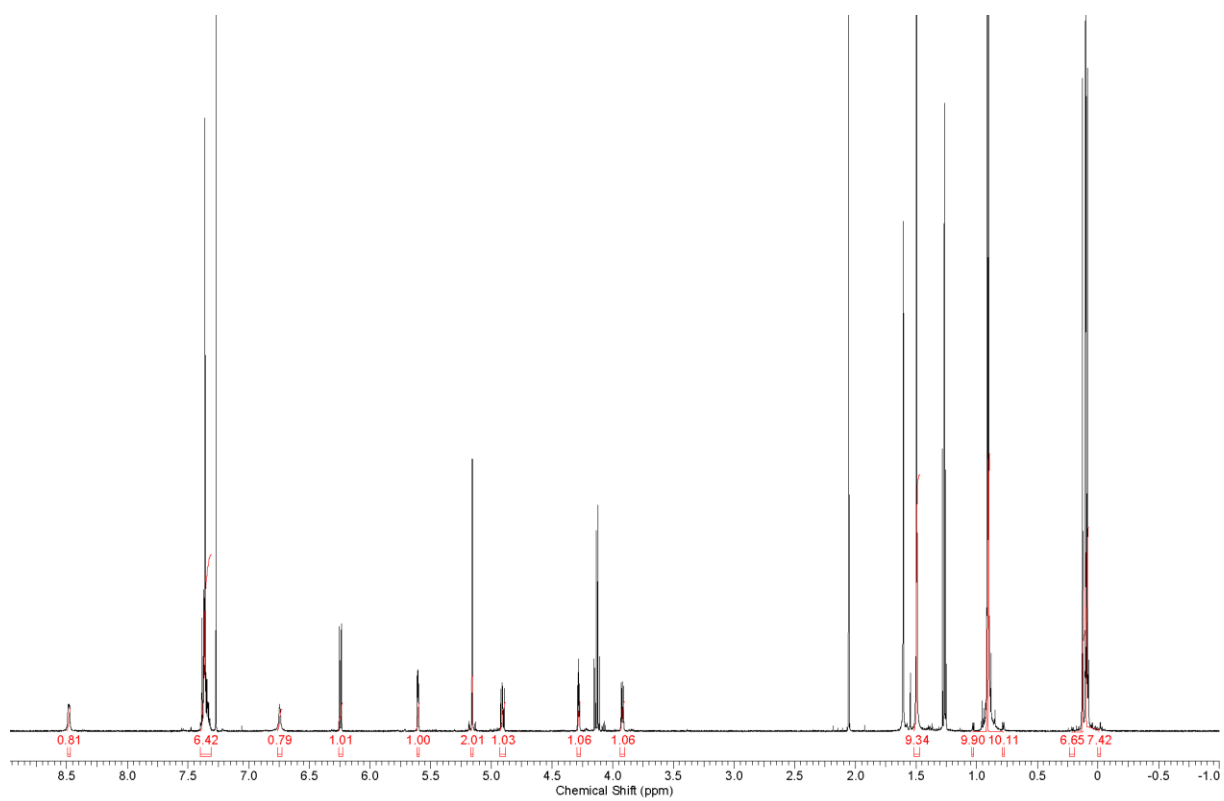

$^1\text{H}$  NMR spectrum of **34** (500 MHz,  $\text{CDCl}_3$ ).

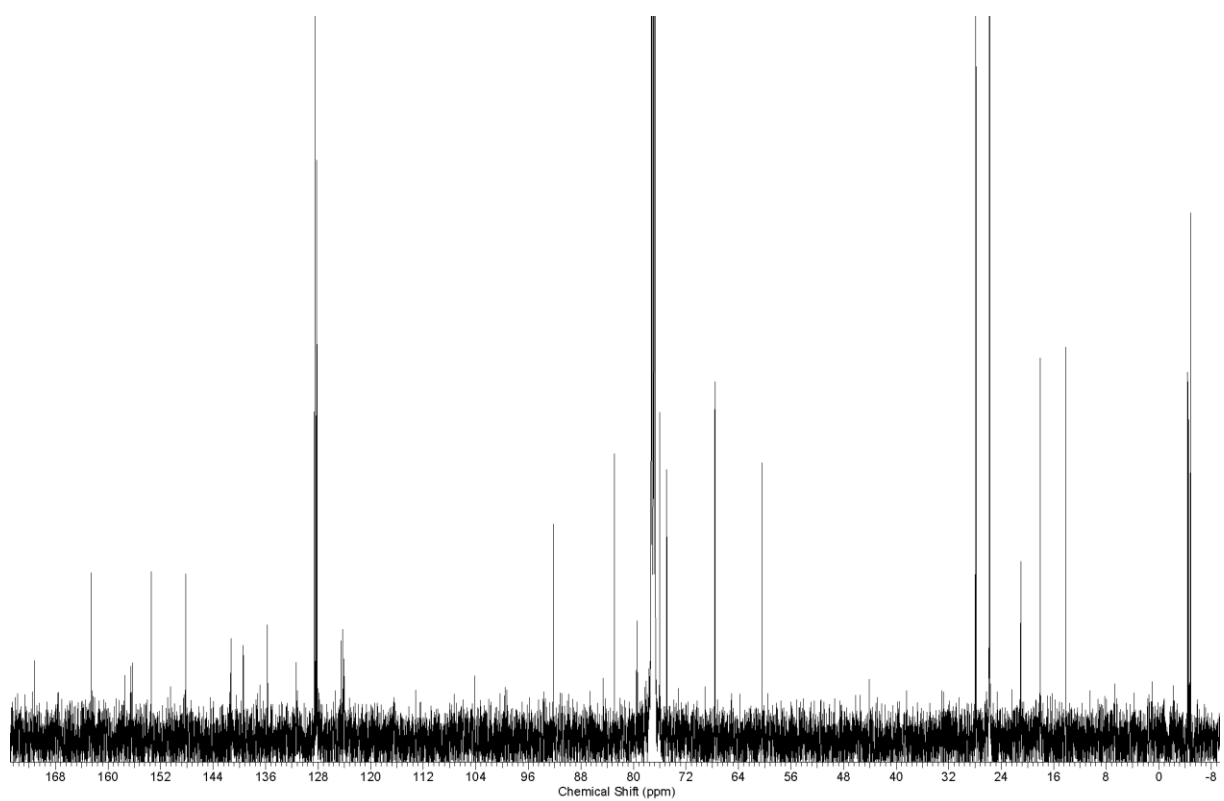

$^{13}\text{C}$  NMR spectrum of **34** (126 MHz,  $\text{CDCl}_3$ ).

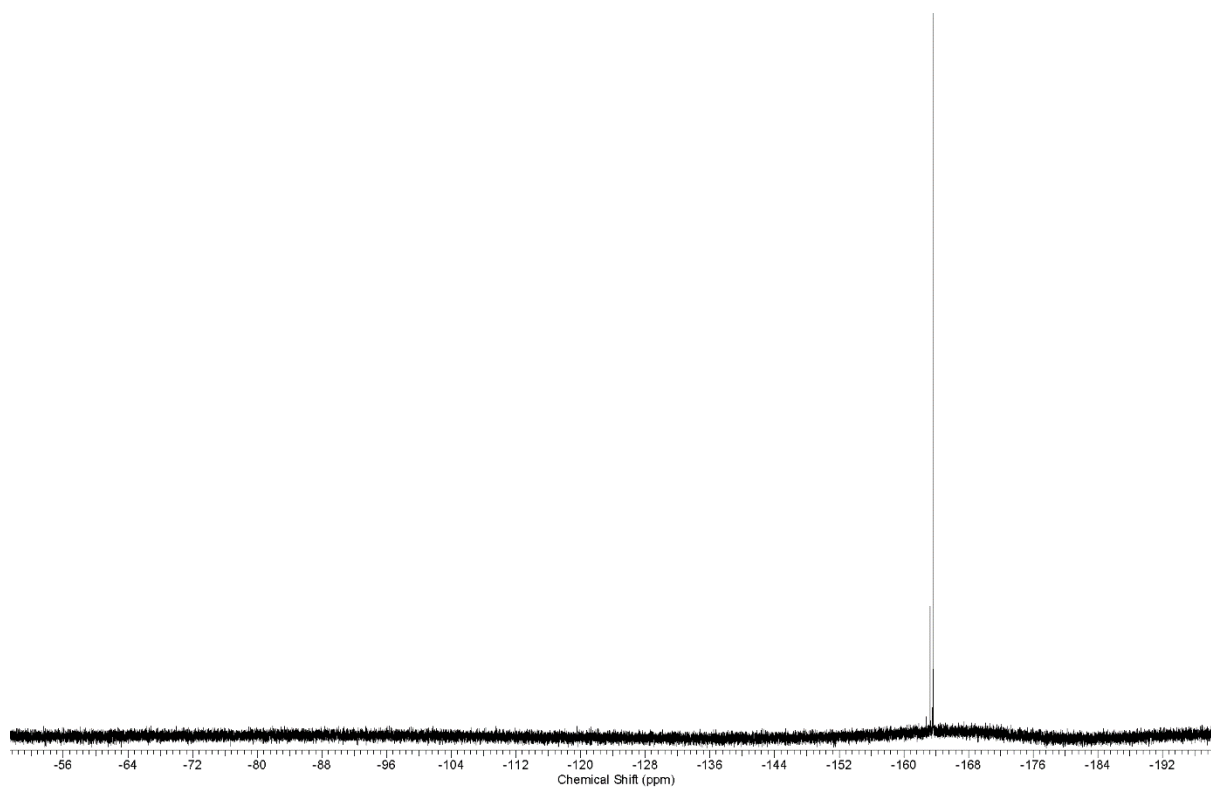

$^{19}\text{F}$  NMR spectrum of **34** (376 MHz,  $\text{CDCl}_3$ ).

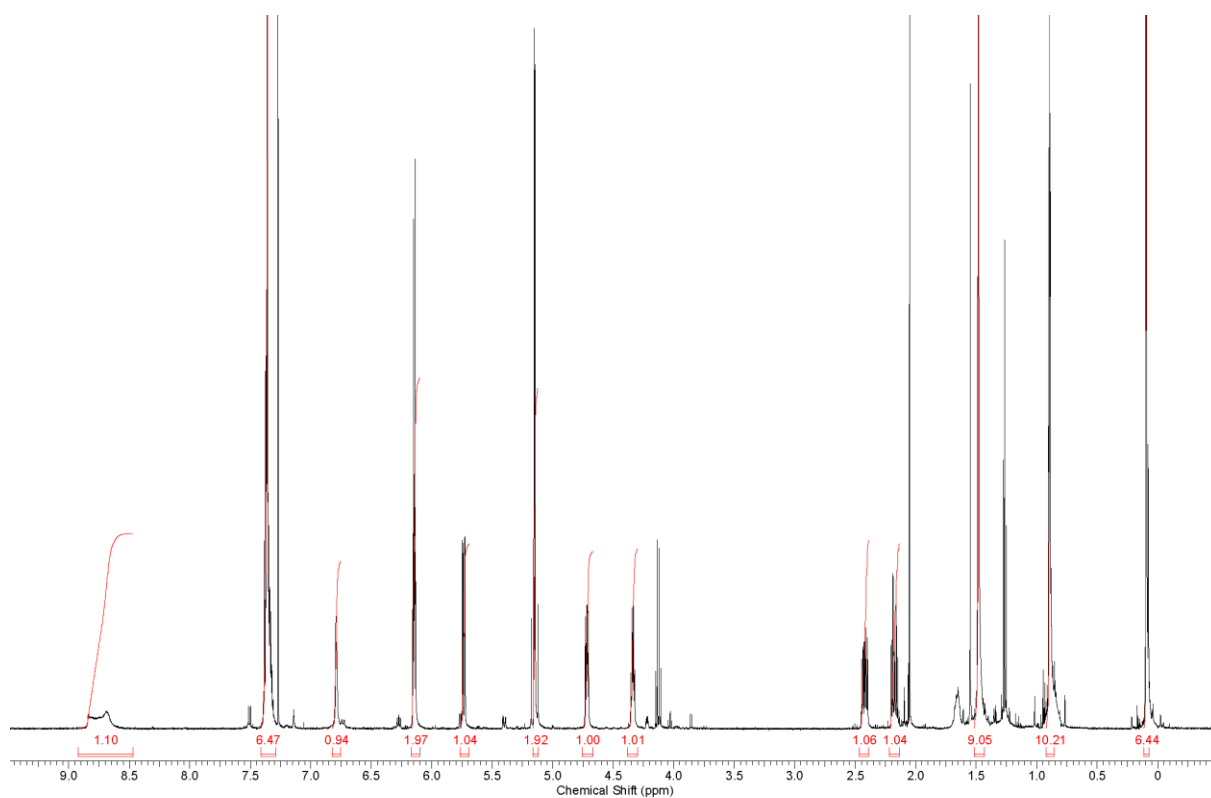

$^1\text{H}$  NMR spectrum of **35** (500 MHz,  $\text{CDCl}_3$ ).

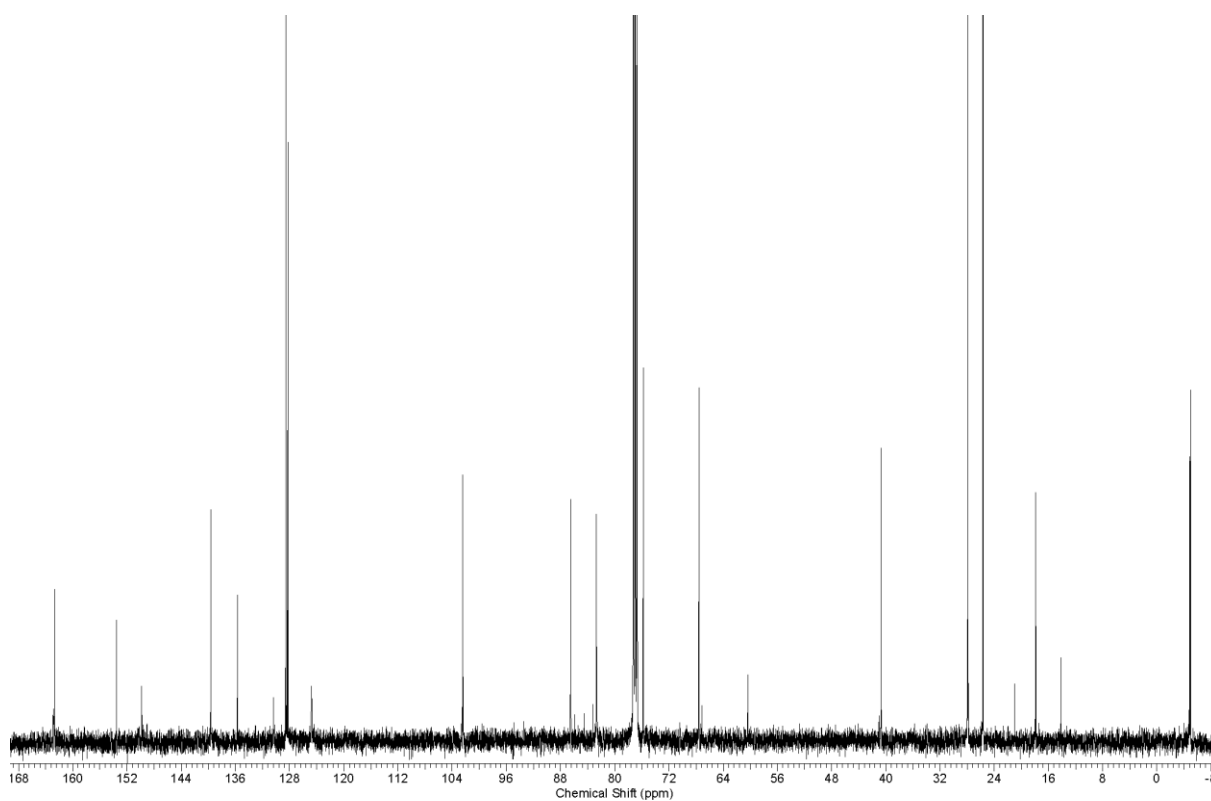

$^{13}\text{C}$  NMR spectrum of **35** (126 MHz,  $\text{CDCl}_3$ ).



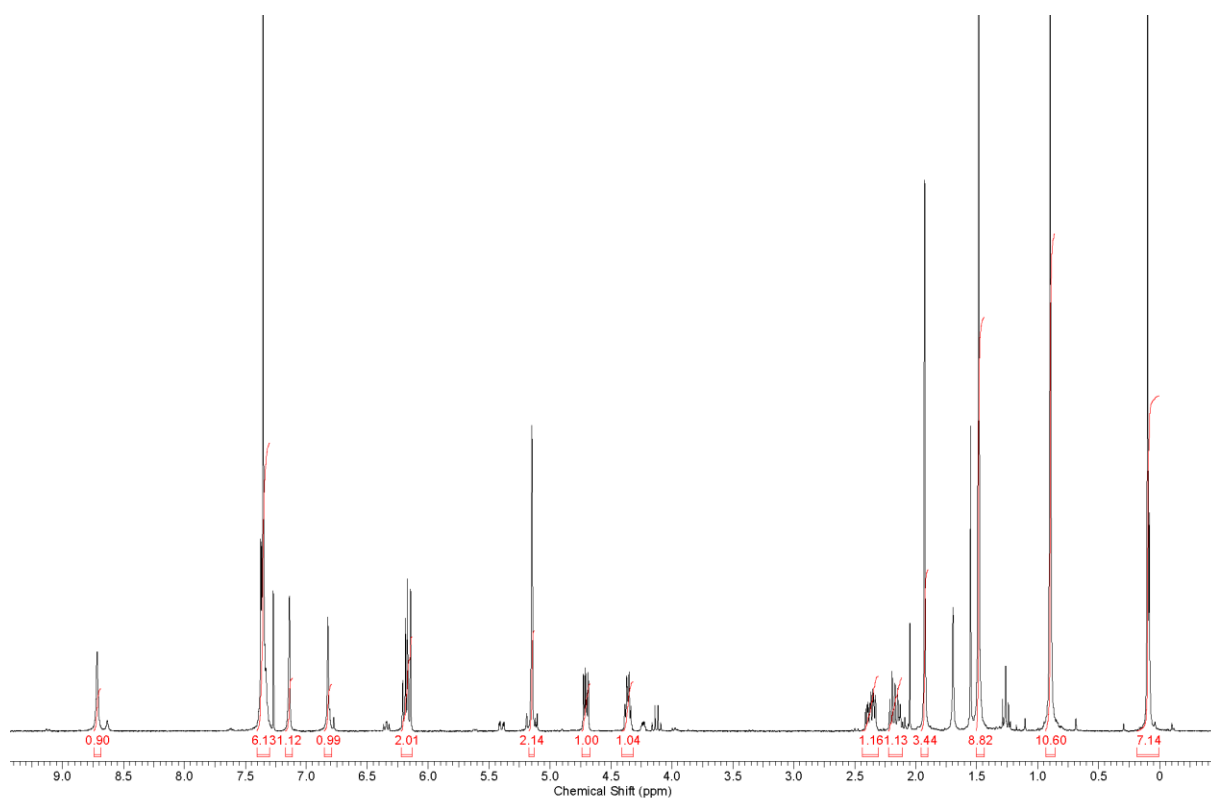

$^1\text{H}$  NMR spectrum of **36** (300 MHz,  $\text{CDCl}_3$ ).

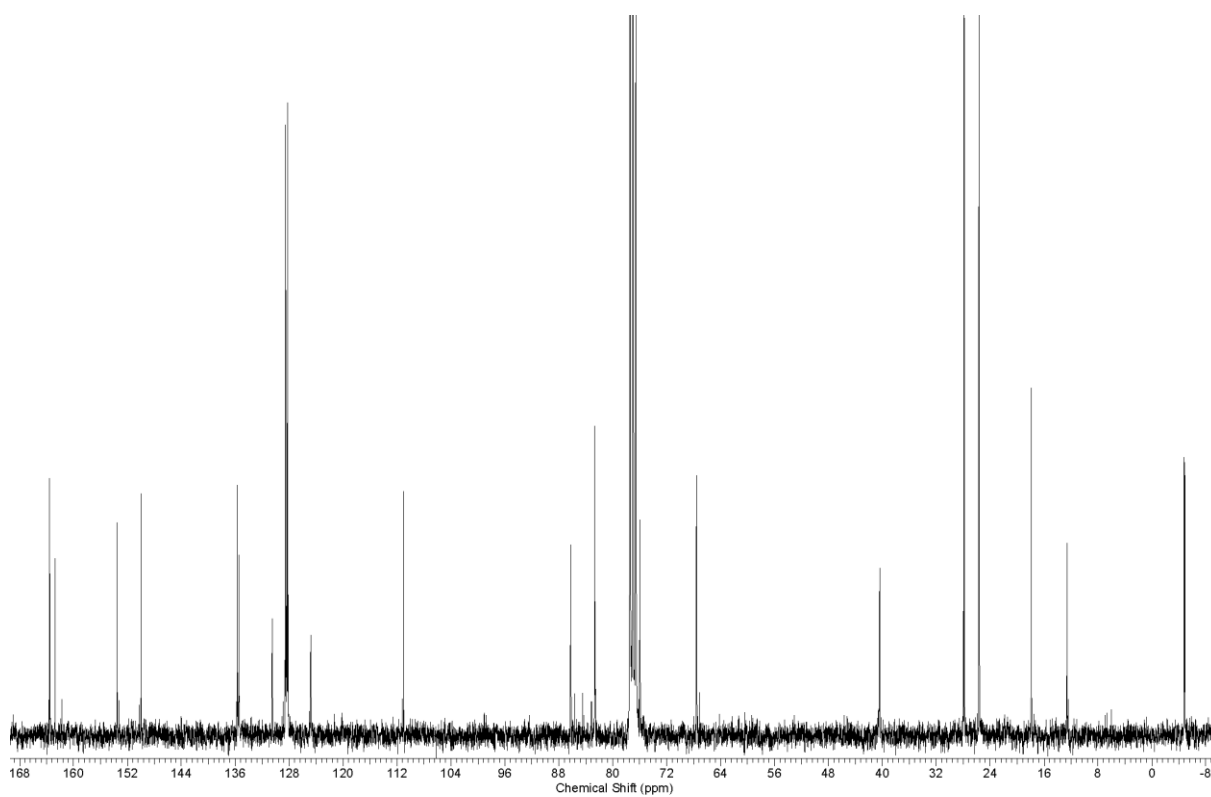

$^{13}\text{C}$  NMR spectrum of **36** (126 MHz,  $\text{CDCl}_3$ ).

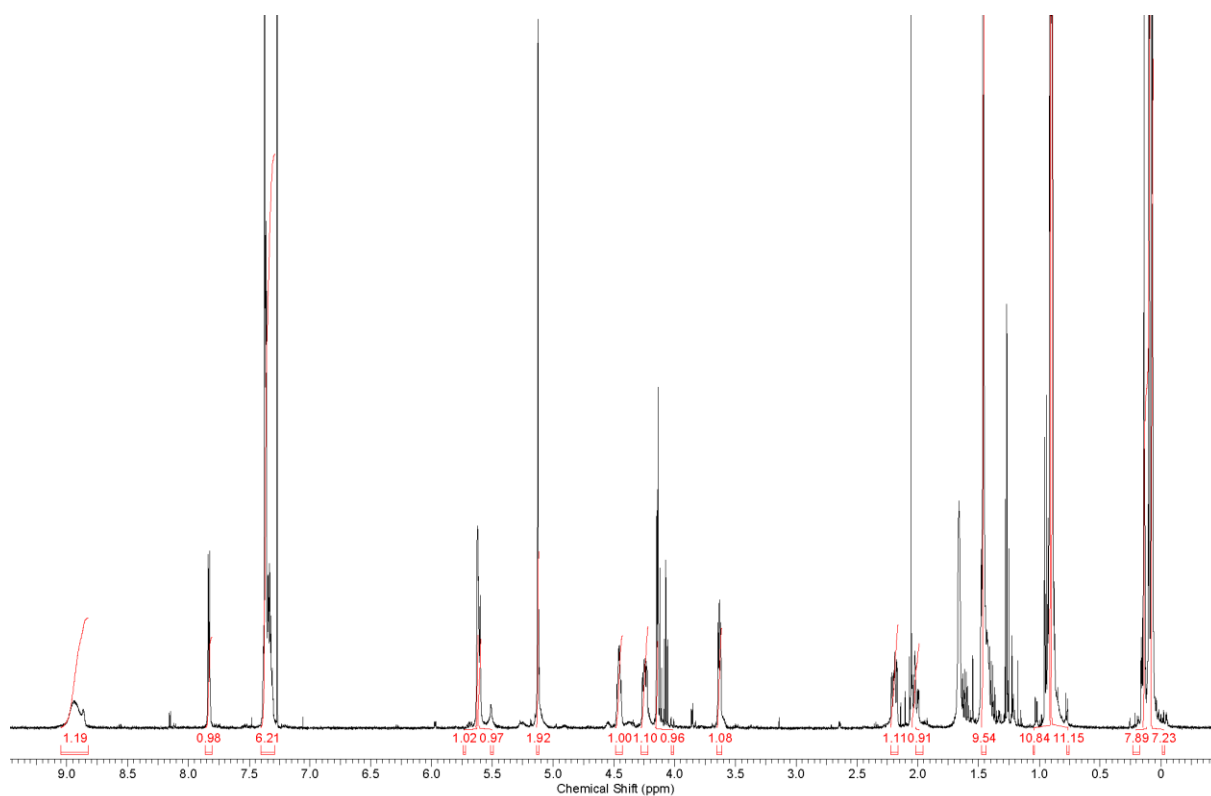

$^1\text{H}$  NMR spectrum of **38** (500 MHz,  $\text{CDCl}_3$ ).

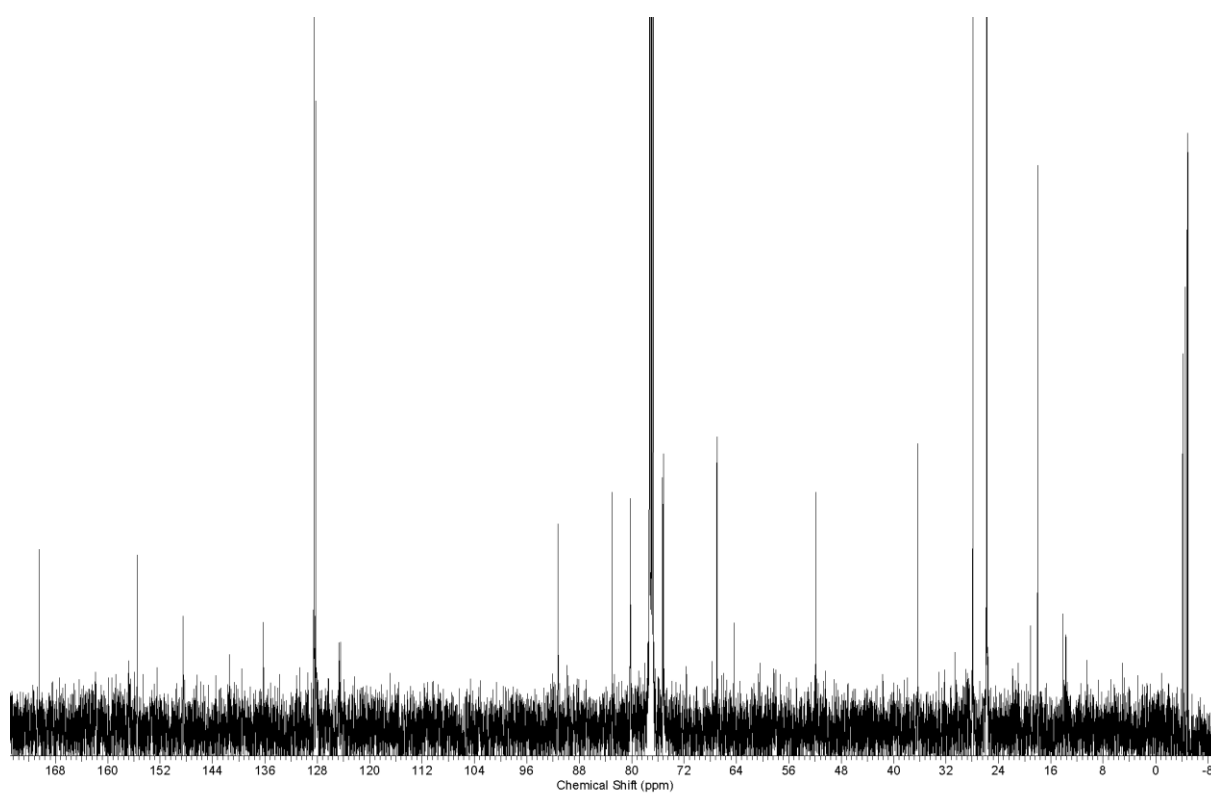

$^{13}\text{C}$  NMR spectrum of **38** (126 MHz,  $\text{CDCl}_3$ ).

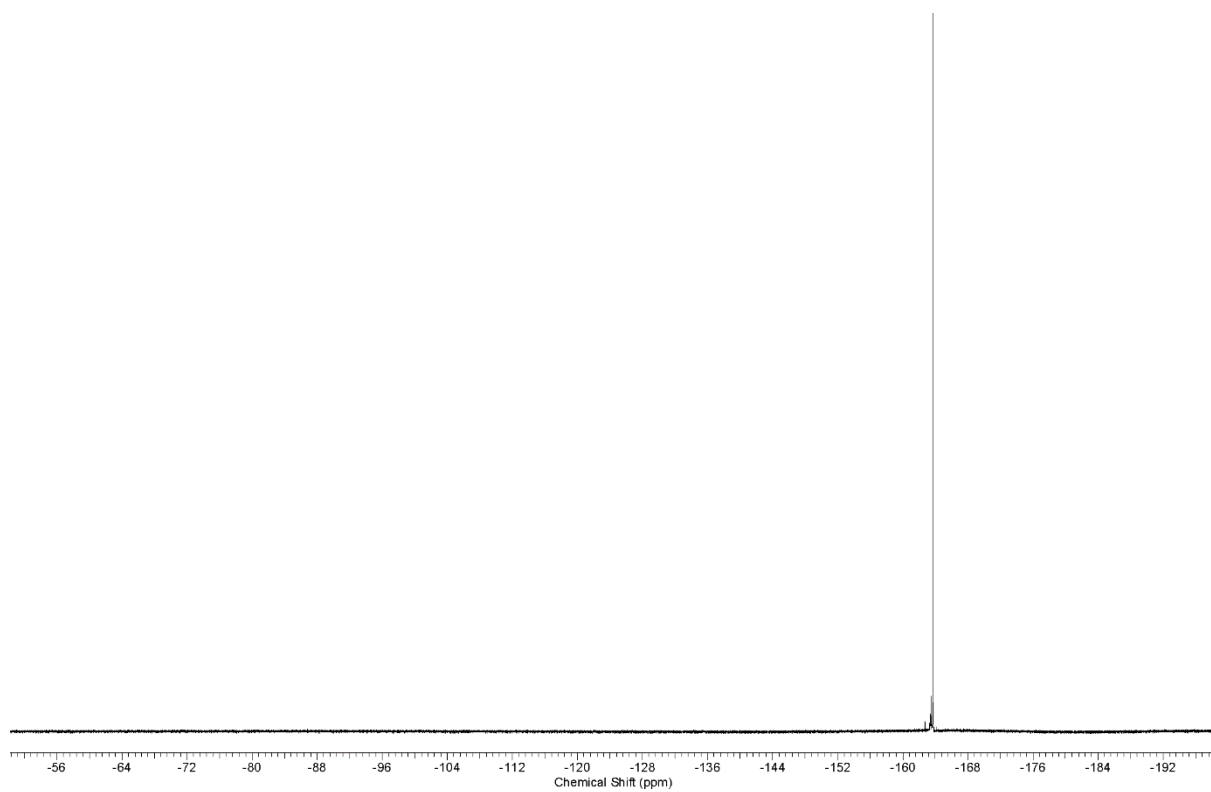

$^{19}\text{F}$  NMR spectrum of **38** (376 MHz,  $\text{CDCl}_3$ ).

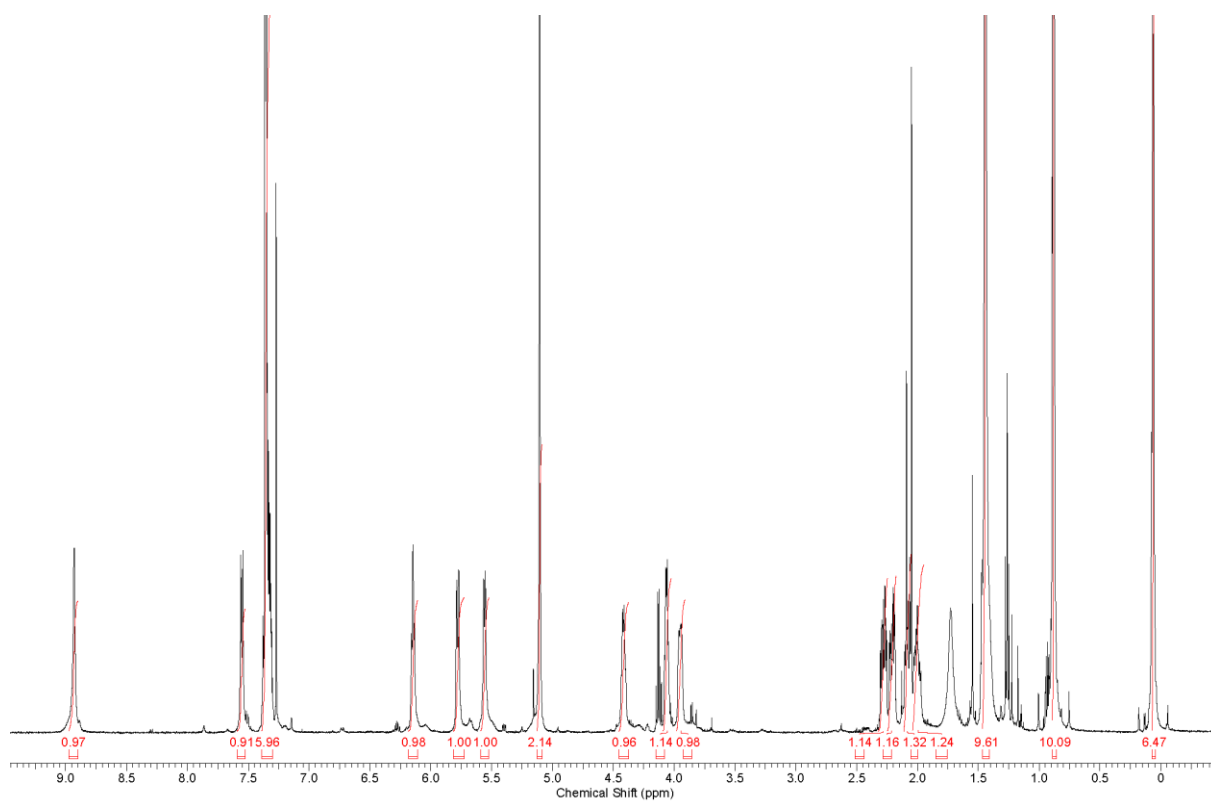

$^1\text{H}$  NMR spectrum of **39** (500 MHz,  $\text{CDCl}_3$ ).

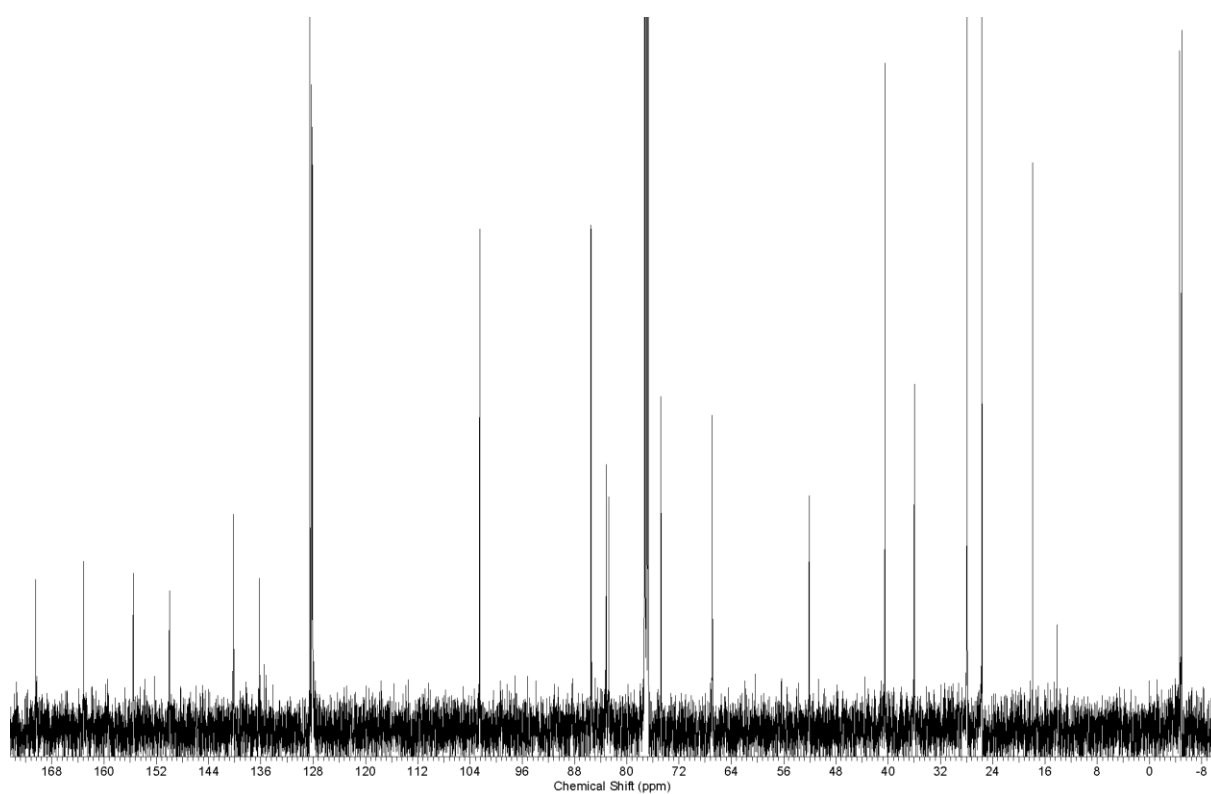

$^{13}\text{C}$  NMR spectrum of **39** (126 MHz,  $\text{CDCl}_3$ ).

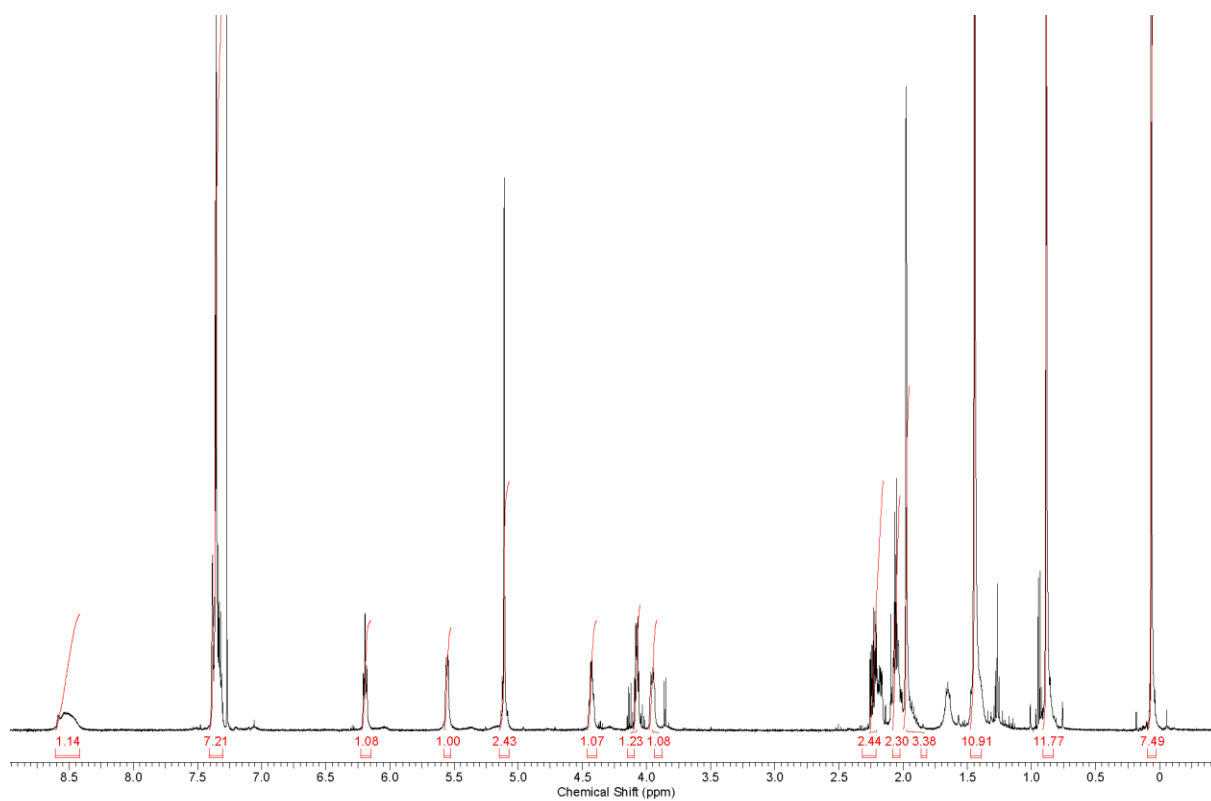

$^1\text{H}$  NMR spectrum of **40** (500 MHz,  $\text{CDCl}_3$ ).

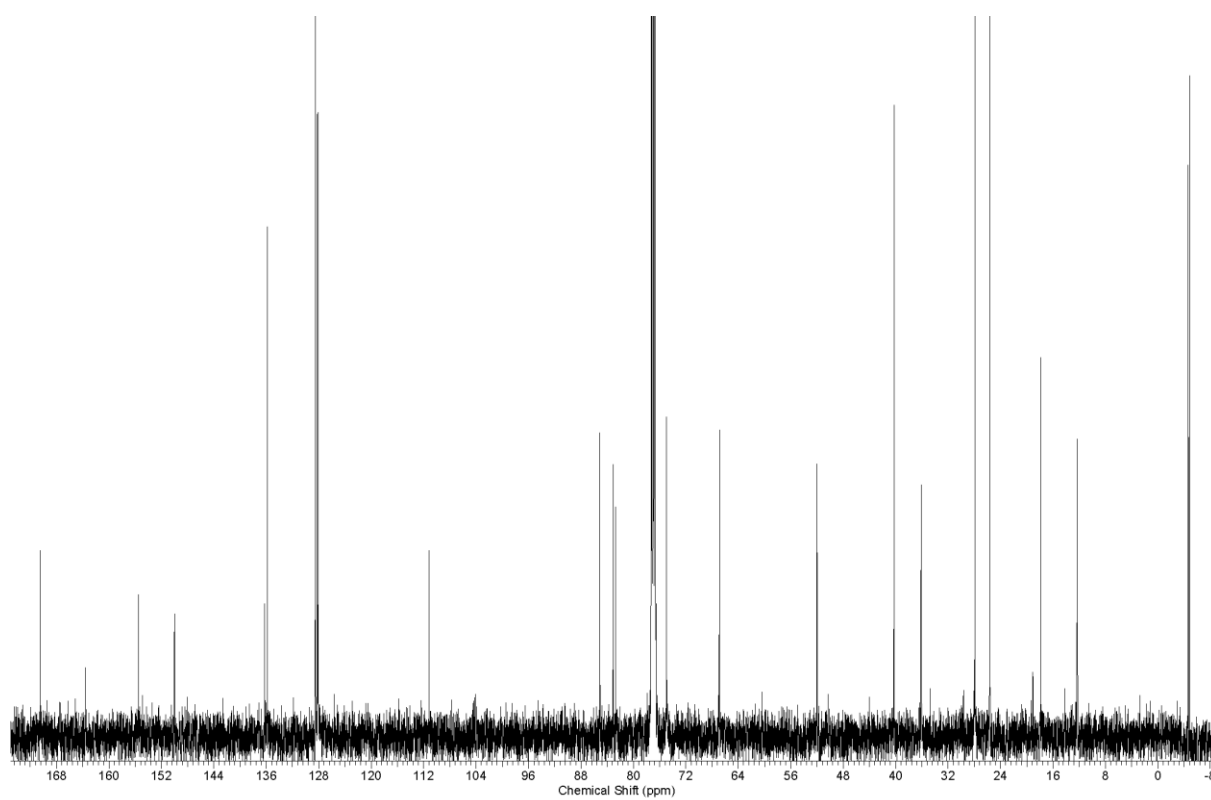

$^{13}\text{C}$  NMR spectrum of **40** (126 MHz,  $\text{CDCl}_3$ ).

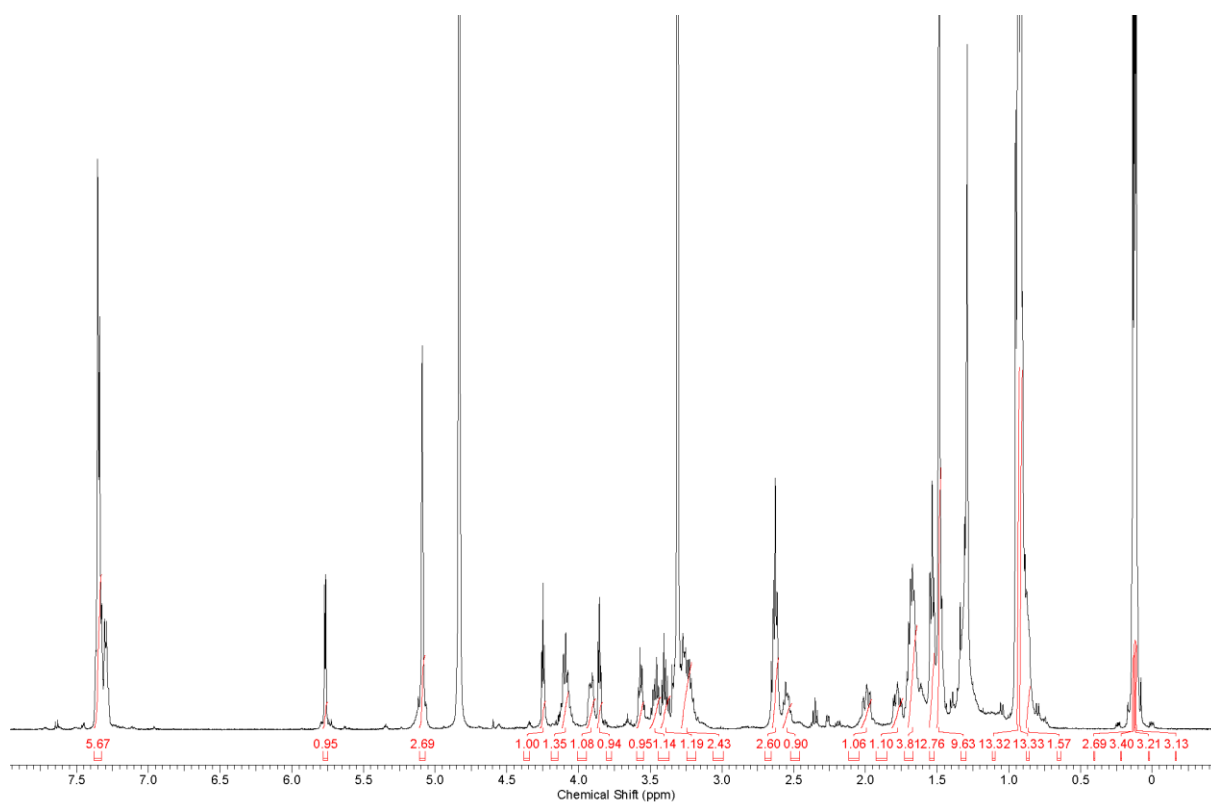

$^1\text{H}$  NMR spectrum of **44** (500 MHz,  $\text{CD}_3\text{OD}$ ).

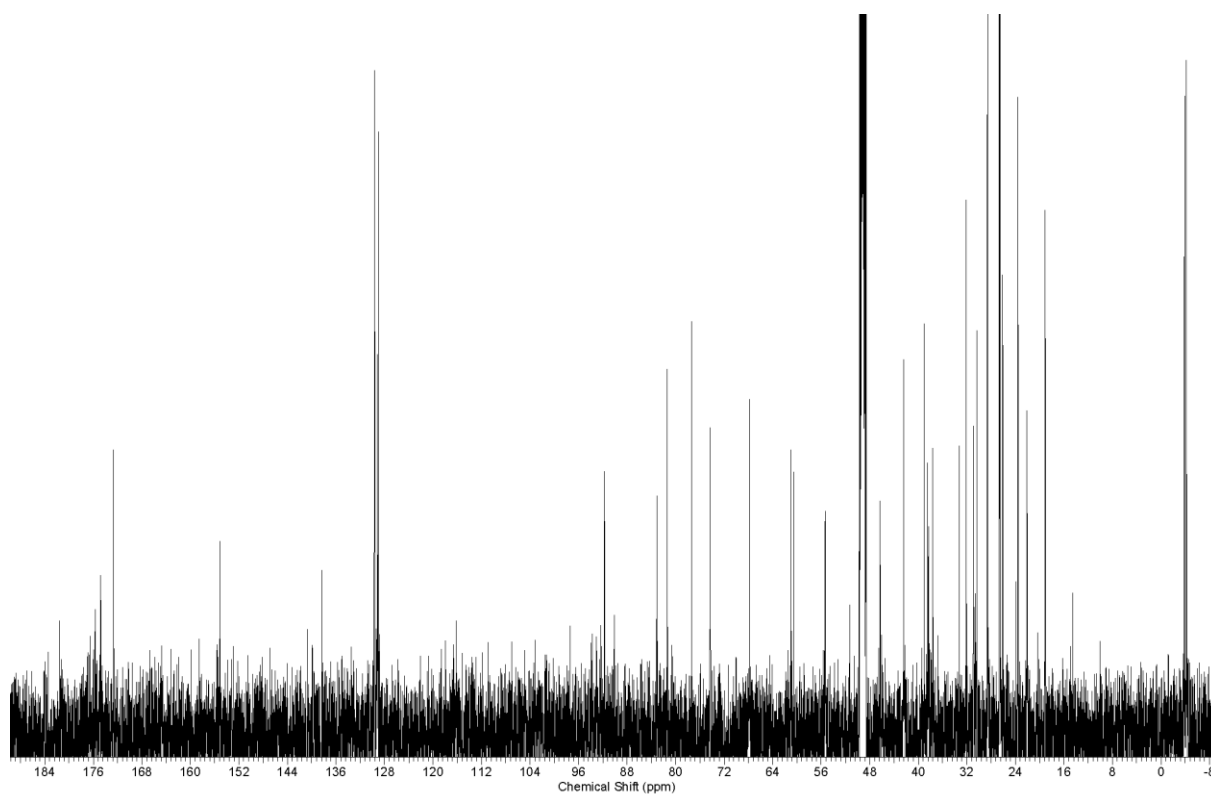

$^{13}\text{C}$  NMR spectrum of **44** (126 MHz,  $\text{CD}_3\text{OD}$ ).
